1 **Recruitment of Peroxin14 to lipid droplets affects triglyceride storage in Drosophila.**

2

3 Condensed Title

4 **Pex14 regulation of lipid droplets**

5

6 Anderson-Baron, Matthew N,<sup>\*1,2</sup> Ueda Kazuki,<sup>\*1</sup> Haskins, Julie,<sup>1</sup> Hughes, Sarah C<sup>1,3</sup>, &

7 Simmonds, Andrew J<sup>1,4,5</sup>

8 \*These authors contributed equally.

9 <sup>1</sup>Department of Cell Biology, Faculty of Medicine and Dentistry, University of Alberta.

10 Edmonton, AB, Canada T6G 2H7

11 <sup>2</sup>Future Fields Ltd. Edmonton, AB, Canada

12 <sup>3</sup>Department of Medical Genetics, Faculty of Medicine and Dentistry, University of

13 Alberta. Edmonton, AB, Canada T6G 2H7

14 <sup>4</sup>Corresponding Author (andrew.simmonds@ualberta.ca)

15 <sup>5</sup><https://orcid.org/0000-0001-7165-9302>

## 16 **Summary statement**

17           Interactions between peroxisomes and lipid droplets is thought to help coordinate  
18 management of cellular lipids. Peroxin proteins are required for peroxisome biogenesis. A  
19 spectrum of effects on triacylglyceride storage was seen when each of the 12 conserved Peroxins  
20 are knocked down in the *Drosophila* fat body with Peroxin14 knockdown having the largest  
21 effect. When *Drosophila* S2 cells were cultured in excess oleic acid, Peroxin3, Peroxin13, and  
22 Peroxin14, but not other Peroxins were localized to lipid droplets independently of other  
23 peroxisome markers. The presence of Peroxin14 at the lipid droplet surface altered recruitment  
24 of perilipin and lipase proteins.

25 **Abstract**

26           The activity of multiple organelles must be coordinated to ensure cellular lipid  
27 homeostasis. This includes the peroxisomes which metabolise certain lipids and lipid droplets  
28 which act as neutral lipid storage centres. Direct organellar contact between peroxisomes and  
29 lipid droplets has been observed, and interaction between proteins associated with the  
30 membranes of these organelles has been shown, but the functional role of these interactions is  
31 not clear. In *Drosophila* cells, we identified a novel localization of a subset of three  
32 transmembrane Peroxin proteins (Peroxin3, Peroxin13, and Peroxin14), normally required for  
33 peroxisome biogenesis, to newly formed lipid droplets. This event was not linked to significant  
34 changes in peroxisome size or number, nor was recruitment of other Peroxin proteins or mature  
35 peroxisomes observed. The presence of these Peroxin proteins at lipid droplets influences their  
36 function as changes in the relative levels of Peroxin14 associated with the lipid droplet surface  
37 directly affected the presence of regulatory perilipin and lipases with corresponding effects on  
38 triglyceride storage.

## 39 **Introduction**

40 Peroxisomes and lipid droplets (LDs) both play crucial roles in regulating cellular lipids  
41 (Lodhi and Semenkovich, 2014; Thiam and Dugail, 2019). Peroxisomes are responsible for  
42 catabolism of branched chain and very-long chain fatty acids (VLCFAs), biosynthesis of ether  
43 lipids, as well as regulating reactive oxygen (Mast et al., 2020). Structurally, peroxisomes consist  
44 of a bilayer membrane containing peroxisome membrane proteins (PMPs), surrounding a core of  
45 enzymes. LDs have a single phospholipid layer surrounding a core primarily composed of  
46 neutral lipids like triglycerides (TG) and cholesterol esters (Olzmann and Carvalho, 2019). LD  
47 activity is regulated by association of proteins like lipases and associated regulatory proteins  
48 regulating transition from TG storage to release of fatty acids (Walther et al., 2017). LDs are  
49 very large and stable in adipocytes, but smaller and transient LDs are seen in other cell types  
50 (Fujimoto and Parton, 2011). LDs form between the ER membrane leaflets and can remain  
51 connected to the ER membrane (Walther et al., 2017). Notably, yeast peroxisomes and LDs can  
52 arise from adjacent domains of the ER (Joshi et al., 2018) suggesting coordinated biogenesis  
53 (Joshi and Cohen, 2019).

54 In animal cells, peroxisomes are needed for  $\beta$ -oxidation of VLCFAs, although they can  
55 catabolize smaller-chain fatty acids when mitochondria are compromised (Violante et al., 2019).  
56 Peroxisome number, size, and composition vary based on cellular demand (Honsho et al., 2016).  
57 Peroxisomes proliferate via fission of existing peroxisomes but can also be assembled *de novo*.  
58 Either of these processes requires a source of new membrane, supplied by pre-peroxisomal  
59 vesicles (PPVs) as well as a conserved group of PMPs in the Peroxin (Pex) family. These  
60 promote recruitment of enzymes from the cytosol into the peroxisome matrix (Kim, 2017). In  
61 animal cells, PPV budding from the ER requires Pex3 and Pex16 (Fakieh et al., 2013; Geuze et



62 al., 2003; van der Zand et al., 2010; van der Zand and Tabak, 2013). Mitochondrial-derived  
63 PPVs can also contribute to peroxisomes in a Pex3 dependent manner (Kim, 2017; Rucktaschel  
64 et al., 2010; Sugiura et al., 2017). Pex19 acts to recruit PMPs from the cytosol for insertion into  
65 the peroxisome (or PPV) membrane. Critical PMPs include Pex13 and Pex14, which form a  
66 transmembrane pore (docking complex) through which enzymes are recruited from the  
67 cytoplasm (Kim and Hettema, 2015).

68 LDs form within the cell when fatty acids are combined by an enzyme cascade into  
69 neutral lipids, most commonly TG, which are inserted between the ER membrane leaflets. In  
70 animal cells, these can bud from the ER and continue to grow (Walther et al., 2017). TG lipolysis  
71 releases fatty acids or other lipid species via the activity of specific lipases acting at the LD  
72 surface. Adipose triglyceride lipase (ATGL) cleaves the first fatty acyl chain from TG leaving  
73 diacylglycerol (DG) (Zimmermann et al., 2004). Hormone-sensitive lipase (Hsl) catalyzes the  
74 cleavage of a fatty acyl chain from DG, leaving monoacylglycerol (MG). MG lipases can cleave  
75 the last fatty acid freeing the glycerol backbone (Lass et al., 2011). The primary regulatory  
76 proteins mediating LD lipolysis are the perilipin (PLIN) proteins (Jackson, 2019). A primary  
77 PLIN function is to regulate lipase access to the LD surface. PLIN activity is often modified by  
78 targeted phosphorylation. To stimulate lipolysis, PLINs also enhance recruitment of cytoplasmic  
79 lipases to the LD surface (Ducharme and Bickel, 2008; Itabe et al., 2017).

80 *Drosophila* homologues of human Peroxin (PEX) proteins show conserved cellular  
81 localization and activity (Anderson-Baron and Simmonds, 2019; Pridie et al., 2020). *Drosophila*  
82 and Schneider 2 (S2) cells have also been used extensively to characterize LDs (Beller et al.,  
83 2006; Kuhnlein, 2011; Lee et al., 2013) *Drosophila* larval development is strongly influenced by  
84 lipid metabolism and the larval adipose tissue localizes to the fat body, which comprises a

85 significant portion of the entire animal (Musselman and Kuhnlein, 2018). *Drosophila* S2 cells  
86 can be induced to form LDs reproducibly and are used extensively to study LDs (Beller et al.,  
87 2006; Guo et al., 2008; Kory et al., 2015; Krahmer et al., 2011; Sui et al., 2018; Wang et al.,  
88 2016; Wilfling et al., 2014; Wilfling et al., 2013). *Drosophila* has only two PLIN homologues:  
89 *Lsd-1* and *Lsd-2* (Beller et al., 2006; Bi et al., 2012; Guo et al., 2008). Upon phosphorylation,  
90 *Lsd-1* facilitates lipid mobilization by recruiting *Drosophila* Hsl to the LD surface, facilitating  
91 lipolysis (Bi et al., 2012). *Lsd-2* serves to protect the surface of LDs from lipases, such as  
92 Brummer (*Bmm*, (Bi et al., 2012). *Bmm* is the *Drosophila* ATGL homologue (Gronke et al.,  
93 2005).

94 In yeast cells grown in excess lipid, peroxisomes stably adhere to the surface of LDs  
95 (Binns et al., 2006). Subcellular fractionation of yeast cells has identified LDs enriched in  
96 peroxisomal  $\beta$ -oxidation enzymes (Binns et al., 2006). Direct peroxisome-LD interaction was  
97 observed by TEM in COS7 cells, with clusters of mature peroxisomes adjacent to the surface of  
98 LDs (Schrader, 2001). Recently it was shown that the M1 form of Spastin protein interacts with  
99 peroxisome resident ATP Binding Cassette Subfamily D Member 1 (*ABCD1*) to promote  
100 interaction of peroxisomes with LDs (Chang et al., 2019). In addition, *Pex1*, *Pex6*, and *Pex26*  
101 were found to be enriched on liver LDs isolated from fasted mice (Kramer et al., 2018). Finally,  
102 *C. elegans* *PEX5* mediates ATGL translocation to LDs facilitating fasting-induced lipolysis of  
103 TGs stored in LDs (Kong et al., 2020). These molecular and physical connections, including  
104 sharing of proteins between peroxisomes and LDs strongly suggest regulated trafficking of  
105 regulatory proteins between these organelles drives functional coordination.

106 Formation of LDs in the larval fat body is a tightly regulated process (Kuhnlein, 2012).  
107 To probe the role of peroxisomes in tissues where LDs are prominent, we performed a screen for

108 reduced activity of each *Drosophila Pex* gene in the larval fat body. Only a few *Pex* genes  
109 showed a fat-body associated phenotype when knocked down by RNA interference (RNAi). The  
110 strongest phenotypes were observed when *Pex14* was inhibited, with loss of LDs and reduced  
111 survival when animals were fed a high-fat diet. To understand the potential mechanism for a  
112 Pex-protein/peroxisomes in LD regulation, we used *Drosophila S2* cells cultured with excess  
113 oleate. Notably, only small differences in peroxisomes were observed when S2 cells were  
114 induced to form new LDs. RNA-seq of these cells indicated that a small subset of genes had  
115 expression changes. Of the peroxisome-associated genes, only *Pex14* had a significant change in  
116 expression. Further, analysis showed that three Pex proteins, Pex3, Pex13, and Pex14 show a  
117 high degree of localization to LDs in oleate cultured cells, and this localization occurs  
118 independently of other markers indicative of peroxisomes. This recruitment of Pex14 to LDs  
119 directly affects lipid storage and subsequent lipolysis as altering the cellular levels of Pex14 by  
120 overexpression or RNAi knockdown changed the relative presence of PLIN and lipase proteins  
121 at the LD surface.

## 122 **Results**

### 123 *RNAi of Pex genes in the Drosophila fat body differentially affects lipid storage.*

124       The fat body comprises a significant proportion of the larval body and is a major  
125 contributor to systemic lipid homeostasis (Church and Robertson, 1966; Musselman and  
126 Kuhnlein, 2018). During early larval development the fat body enlarges, but in the late stages of  
127 development larvae stop feeding and metabolism depends on fat body TG stores (Musselman  
128 and Kuhnlein, 2018). Mutations affecting fat storage can be assayed using a buoyancy assay  
129 (Reis et al., 2010). To screen for the role of peroxisomes in LD formation we performed a  
130 systematic RNAi screen, knocking down each *Pex* mRNA in fat body (Figure 1 A-B,  
131 Supplementary Figure 1). RNAi knockdown of most *Pex* genes in the fat body caused some  
132 effect on total fat storage, *Pex3*, *Pex14*, and *Pex16* RNAi had the greatest effects (Figure 1C).  
133 Closer examination of one *Pex14* RNAi knockdown line (GD2759) confirmed a highly  
134 significant reduction in decreased buoyancy (Figure 1D), correlated with reduction in total  
135 glycerol content (an indirect measure of TG, 25%,  $p < 0.01$ ) compared to control larvae (Figure  
136 1E). In wild type fat body, large LD occupied fat body cells (Figure 1F), whereas when *Pex14*  
137 RNAi was targeted to the fat body smaller LDs were observed (Figure 1G). The average  
138 reduction in LD volume was  $11.96\mu\text{m}^3$  (Figure 1H).

139       Lipids can be synthesised *de novo* or absorbed from the diet by the gut. *Drosophila* larvae  
140 store TG in LDs within the fat body to fuel subsequent pupal development (Heier and Kühnlein,  
141 2018). Third instar larvae were raised on a chemically defined (holidic, (Piper et al., 2014) diet  
142 where the only added lipid was cholesterol as *Drosophila* are cholesterol auxotrophs. (Vinci et  
143 al., 2008). Larvae with *Pex13*, *Pex14*, or *Pex1* RNAi knockdown in the fat body (Figure 1I)  
144 survive equally well on a holidic diet. Larvae will consume a lipid rich diet when lard is added to

145 their food (Woodcock et al., 2015). When flies were raised on holidic + lard food, the survival  
146 rate of wild type or *Pex1* RNAi fat body knockdown larvae was like those raised on holidic food.  
147 However, fat body RNAi knockdown of *Pex13* or *Pex14* strongly reduced survival on lard-  
148 supplemented food (Figure 1I).

149 *RNA-Seq of S2 cells in conditions promoting LD formation or lipolysis.*

150 *Drosophila* S2 cells rapidly form LDs that are consistent in both number and volume  
151 (Guo et al., 2008) when cultured medium supplemented with oleate (+Oleate) (Darfler, 1990), an  
152 18-carbon monounsaturated fatty acid. +Oleate culture conditions caused relatively little change  
153 in peroxisome number (Figure 2A). To determine the differential regulation of peroxisome  
154 versus LDs, RNA sequencing was used to compare cells cultured in Schneider's medium + FBS  
155 (Standard) versus +Oleate conditions. This identified 249 mRNAs that consistently showed  
156 significant changes in relative abundance (n=3, padj<0.1, Figure 2B, Supplementary Table 1).  
157 Gene Ontology (GO) clustering showed differentially expressed mRNAs encoded proteins linked  
158 to mitochondria, peroxisomes, and the endomembrane system (Supplementary Table 2). In terms  
159 of predicted molecular function, there was enrichment of mRNAs encoding multiple proteins  
160 involved in peroxisomal fatty acid  $\beta$ -oxidation (Supplementary Table 2). However, this was not  
161 paired with a corresponding increase in mRNAs encoding the peroxisome biogenesis (Pex)  
162 factors required for peroxisome proliferation. In fact, only one *Pex* mRNA, *Pex14*, was  
163 significantly (padj < 0.1) enriched in S2 cells cultured in +Oleate conditions (Supplementary  
164 Table 1). Increased expression of *Pex14*, and a slight increase in *Pex13* was detected by  
165 quantitative RT-PCR (qRT-PCR) in +Oleate cultured S2 compared to Standard conditions (Figure  
166 2C). Relatively less change was observed other *Pex* genes (Supplementary Table 1), e.g., *Pex2*  
167 (Figure 2C). When cells were transferred to Lipolytic conditions, levels of *Pex2*, *Pex13*, and

168 *Pex14* mRNA were all elevated compared to standard culture, but to a lesser extent (Figure 2C).

169 *Pex14* localized to LDs when S2 cells were cultured in +Oleate conditions.

170 When S2 cells were cultured in standard conditions, the punctate signal from anti-SKL  
171 (mature peroxisomes) and anti-Pex14 largely overlapped (Figure 2D). When S2 cells were  
172 cultured in +Oleate conditions, additional Pex14 signal surrounded LDs, independently of SKL  
173 (Figure 2E). When S2 cells were subsequently transferred to Lipolytic conditions, less punctate  
174 Pex14 independent of SKL signal was observed, except surrounding the large LDs (Figure 2F).  
175 Western blotting showed that endogenous Pex14 protein levels were elevated in +Oleate S2 cells  
176 but far less so in Lipolytic conditions (Figure 2G-H). In + Oleate cells, peroxisome marker  
177 protein membrane-associated ATP binding cassette subfamily D member 3 (Abcd3, also known  
178 as Pmp70) did not localize to LDs except when part of peroxisomes as evidenced by co-  
179 localization with SKL (Figure 2 I), whereas much of the Pex14 signal was independent of SKL  
180 (Figure 2J). When cells were transferred to Lipolytic conditions, two phenotypes were observed,  
181 when large LDs were present, they were surrounded by peroxisome independent Pex14 (Figure  
182 2K), whereas when only small LDs were present, Pex14 largely overlapped with peroxisomes  
183 (Figure 2L). Quantification of the three-dimensional co-localization of individual cells of each  
184 category showed that Pex14 co-localization to LDs independently of SKL was significantly  
185 higher than Abcd3 (Figure 2M-Q).

186 *Pex14* RNAi knockdown altered TG lipolysis and LD morphology.

187 In S2 cells treated with *Pex14* dsRNA, PTS1-mediated (SKL) peroxisomal import was  
188 shown previously to be reduced (Mast et al., 2011). No change in the spatial distribution of  
189 peroxisomes relative to LDs was detected in +Oleate or Lipolytic cultured cells treated with  
190 *Pex14* dsRNA (Figure 3A-D). In +Oleate cells *Pex14* RNAi treatment significantly reduced the

191 average volume of peroxisomes relative to control cells (Figure 3E). When cells were transferred  
192 to Lipolytic conditions this relative difference was not longer present (Figure 3E). Conversely  
193 *Pex14* RNAi had no significant effect on peroxisome number in +Oleate cells but did strongly  
194 suppress peroxisome number when cells were later (+48h) transferred to Lipolytic conditions  
195 (Figure 3F). Increased LD number and volume in +Oleate conditions has been shown previously  
196 to be a function of increased TG storage in S2 cells (Guo et al., 2008). *Pex14* dsRNA did not  
197 significantly affect the rate of TG storage in LDs in +Oleate cells (Figure 3G-H). However,  
198 *Pex14* RNAi had a significant effect on LD volume and number when cells were later (+48h)  
199 transferred to Lipolytic conditions (Figure 3G-H). Colorimetric assays measuring lipoprotein  
200 lipase-induced changes in glycerol levels have been shown previously to largely correspond to  
201 TG levels in *Drosophila* cell lysates (Tennessen et al., 2014). *Pex14* RNAi treatment had a  
202 significant effect on TG levels when cells were transferred from +Oleate to Lipolytic conditions  
203 (Figure 3I). This suggested *Pex14* regulation of lipolysis of TGs that was separable from its  
204 function at peroxisomes. Reduction in *Pex14* mRNA by RNAi treatment was confirmed by  
205 qRTPCR in all experiments (Figure 2J).

206 In metazoan cells, peroxisomes are continually regenerated with an approximate half-life  
207 of approximately 2 days, in a process that requires 12 conserved Pex proteins (Nordgren et al.,  
208 2013). Myc-tagged *Drosophila* Pex proteins, except Pex3, largely overlap with the SKL  
209 peroxisome marker in S2 cells (Baron et al., 2016) including Pex14 (Figure 3K). Myc-tagging  
210 did not affect peroxisome (SKL) independent localization of Pex14 to LDs in +Oleate cultured  
211 cells (Figure 3L-O). Pex14 is a highly stable protein with a relatively low rate of turnover  
212 (Natsuyama et al., 2013). When S2 cells were cultured in transferred (+48h) from +Oleate to  
213 Lipolytic conditions 6xMyc-Pex14 remained associated with LDs independently of mature

214 peroxisomes (Figure 3P). 6xMyc-Pex14 was present in the protein fraction of LDs isolated  
215 +Oleate cells for at least 48h (Figure 3Q). Pulse-chase radioactive protein labelling showed  
216 multiple newly synthesised proteins are recruited to LDs in +Oleate cells (Figure 3R). Western  
217 blotting of the fractions showed that the proportion of 6xMyc-Pex14 in the LD fraction was  
218 elevated when cells were cultured in +Oleate conditions for 24-72hr (Figure 3S).

219 *Pex3, Pex13 are Pex14 are the only Pex proteins localized to LDs independently of peroxisomes.*

220 We showed previously that except for Pex3, Pex7 and Pex19, Myc-tagged *Drosophila*  
221 Pex proteins are localized to mature (SKL-important competent) peroxisomes (Baron et al.,  
222 2016). A similar recruitment specifically to peroxisomes is seen in +Oleate cells (Figure 3T-U).  
223 However, like Pex14, Pex3 and Pex13 localized to LDs independently of peroxisomes (marked  
224 by SKL) when cells were cultured in +Oleate conditions (Figure 3V-X).

225 *Pex14 localizes to LDs in a Pex19 independent manner.*

226 Pex19 is predicted to be required for membrane insertion of Pex3, Pex13 and Pex14 (Itoh  
227 and Fujiki, 2006). In +Oleate S2 cells, a significant portion of the Pex14 can be observed  
228 surrounding a subset of LDs while the rest were localized to peroxisomes (Figure 2Q). Pex14  
229 was shown previously to be localized to mitochondria in human fibroblasts when Pex19 is absent  
230 (Sacksteder et al., 2000). In +Oleate S2 cells, Pex14 surrounding LDs was independent from a  
231 mitochondrial marker, Cytochrome C (CytC, Figure 4A). S2 cells deleted for *Pex19* (Pex19KO)  
232 that were also expressing neonGreen-SKL, no punctate signal was observed corresponding to  
233 mature peroxisomes (Figure 4B). However, in these same cells, Pex14 still surrounded LDs in  
234 +Oleate conditions (Figure 4B). CytC and SKL signal does overlap in some places in the cytosol,  
235 but not adjacent to LDs (Figure 4C). Pex16 is also needed for PMP insertion, and in *Pex16* RNAi  
236 knockdown cells (+Oleate) Pex14 does not localize to peroxisomes or LDs (Figure 4D). SKL,



237 Pex14 and CytC did not appreciably co-localize in Pex19KO cells under standard culture  
238 conditions (Figure 4E). In Pex19KO cells (+Oleate) Pex14 was largely unassociated with CytC  
239 but very strongly localized to LDs (Figure 4F).

240 *The C-terminal region of Pex14 was required for LD association.*

241 In 2019, Barros-Barbosa et al. showed that rat PEX14 is an intrinsic membrane protein  
242 with an N-in C-out topology (Barros-Barbosa et al., 2019; Reuter et al., 2021). Myc-tagged N-  
243 and C-terminal truncations of Pex14 were tested for localization to LDs or peroxisomes in  
244 +Oleate cells (Figure 4G). The N-terminal 78 amino acid region of Pex14 is homologous to a  
245 domain in mammalian PEX14 that associates strongly with microtubules (Bharti et al., 2011)  
246 *Drosophila* Pex14 amino acids 1-148 include a region homologous to the N-terminal ‘Pex14’  
247 domain in yeast and human homologues (Mast et al., 2011). This region also contains a predicted  
248 transmembrane domain (TM, aa 117-148 Figure 4G), homologous to yeast Pex14p or  
249 mammalian PEX14 (Niederhoff et al., 2005; Oliveira et al., 2002). Full length 6xMyc-Pex14  
250 localized to LDs in +Oleate (+48h) S2 cells (Figure 4H). Pex14<sup>1-78</sup> did not co-localize with LDs  
251 or peroxisomes (Figure 4I). The N-terminal Pex14<sup>1-117</sup> (lacking the TM domain) also did not co-  
252 localize with LDs or peroxisomes (Figure 4J). However, Pex14<sup>1-148</sup>, which encompassed the N-  
253 terminal half of Pex14 including the TM domain co-localized with GFP-SKL (peroxisomes) but  
254 not LDs (Figure 4K). The C-terminal half of Pex14 that includes the TM domain (Pex14<sup>117-280</sup>)  
255 localized to LDs but not peroxisomes (Figure 4L). Pex14<sup>148-280</sup> encompassing the C-terminal half  
256 of Pex14 but lacks the TM domain localized to neither peroxisomes nor LDs (Figure 4M).

257 *Directly altering the amount of Pex14 at the LD surface affected recruitment of lipases*

258 The mRNA encoding *Drosophila* Hormone sensitive lipase (*Hsl*) was also relatively  
259 much higher in S2 cells cultured in +Oleate conditions (Supplementary Table 1). Thus, we

260 examined the relative recruitment of LD lipases Bmm and Hsl to LDs in S2 cells where the level  
261 of Pex14 was elevated via transgene expression. When S2 cells were transferred Lipolytic  
262 culture conditions for 24 h, 3xFLAG-Bmm surrounded the LD periphery, especially those that  
263 were smaller than when cells were in +Oleate conditions (Figure 5A). When Lipolytic cells were  
264 co-transfected with *Bmm* and *Pex14* transgenes both Bmm and Pex14 co-localized at the LD  
265 surface (Figure 5B). The DG lipase HSL also surrounded LDs in Lipolytic S2 cells (Figure 5C).  
266 When *Hsl* and *Pex14* were co-overexpressed, Hsl was observed in a cytosolic punctate pattern  
267 distinct from LDs, while Pex14 surrounded a subset of relatively large LDs (Figure 5D). 50-60%  
268 of the total signal from Myc-Pex14 was recruited to LDs even if Bmm or Hsl levels were also  
269 elevated (Figure 5E). However, colocalization between FLAG-Hsl and LDs (LipidTOX) was  
270 reduced significantly from 62.2% to 35.9% when Myc-Pex14 was co-overexpressed (Figure 5F).  
271 LD volume and number per cell were relatively unaffected when FLAG-Bmm and Myc-Pex14  
272 were co-overexpressed (Figure 5G-H). However, expressing FLAG-Hsl and Myc-Pex14  
273 simultaneously caused a significant decreased LD number and increased LD volume (Figure 5G-  
274 H). Increased number and decreased LD volume indicates elevated lipase activity  
275 (Marcinkiewicz et al., 2006).

#### 276 *Pex14* recruitment to LDs was affected by *Drosophila* perilipin proteins.

277 *Drosophila* has two PLIN proteins, Lsd-1 and Lsd-2. While there is some overlap in their  
278 activities, generally, Lsd-1 facilitates LD lipid mobilization by Hsl while Lsd-2 suppresses Bmm-  
279 mediated lipolysis at LD (Beller et al., 2010; Marcinkiewicz et al., 2006). Thus, we examined  
280 how altered Lsd-1 or Lsd-2 affects Pex14 recruitment to LDs. In +Oleate S2 cells simultaneously  
281 overexpressing tagged Pex14 and Lsd-1, Pex14 was prevented from being localized to LDs  
282 (Figure 5I). Conversely, when Lsd-2 and Pex14 were co-overexpressed, both localized to the LD

283 surface (Figure 5J). In +Oleate cultured S2 cells, FLAG-Lsd-1 and FLAG-Lsd-2 showed  
284 approximately 70% colocalization with the LD surface (Figure 5K). However, recruitment of  
285 Myc-Pex14 to LDs was significantly lower (26.5%,  $p < 0.01$ ) when FLAG-Lsd-1 was  
286 simultaneously overexpressed (Figure 5L). Overexpression of FLAG-Lsd-1 had similar effect on  
287 localization of Myc-Pex3 or Myc-Pex13 to LDs (Figure 5M-N).

### 288 Recruitment of Pex14 to LDs is conserved in mammalian NRK and Huh7 cells

289 When NRK cells were cultured in DMEM + 10% FBS (Standard) conditions, PEX14 was  
290 largely recruited to mature peroxisomes marked by ATP-binding cassette sub-family D member  
291 3 (ABCD3, Figure 6A). When NRK cells were cultured in DMEM +10% FBS + 1 mM oleate for  
292 48h (+Oleate), a significant portion of PEX14 was observed as punctate signal surrounding LDs  
293 that was distinct from ABCD3 (Figure 6B). A similar effect was seen in +Oleate cultured Huh7  
294 cells (Figure 6C-D). Colocalization between PEX14 and the LD surface increased significantly  
295 from 3.5% in Standard conditions to 42.8% in + Oleate conditions (Figure 6E). However,  
296 localization of a mature peroxisomes (ABCD3) did not change significantly when NRK cells  
297 were cultured in Standard or +Oleate conditions (Figure 6F). Like what was observed in S2 cells,  
298 no change in peroxisome volume was observed in +Oleate NRK cells (Figure 6G), however  
299 peroxisome number increased significantly (Figure 6 H). Like what occurred in +Oleate cultured  
300 S2 cells, PEX14 levels were elevated in NRK cells cultured in +Oleate at 24h and persisting for  
301 at least 48h (Figure 6 I-J). TEM-immunolabelling of +Oleate NRK cells showed that PEX14 was  
302 associated with membranes, including those of presumptive LDs or LD-associated vesicles  
303 ranging in size from 40-100 nm in diameter (Figure 6K-L). The majority of PEX14 was localized  
304 within 40nm of the LD surface (Figure 6M).

## 305 Discussion

306 There is a lipid-responsive localization of a subset Pex proteins (Pex3, Pex13 and Pex14)  
307 that cooperate in the early stages of peroxisome proliferation to LDs that occurs independently of  
308 markers associated with mature peroxisomes. The primary driver of this activity appears to be  
309 Pex14. When associated with LDs, Pex14 affects recruitment of lipases and PLIN proteins and  
310 influences storage and mobilization of TGs from LDs. However, the localization to, and  
311 regulation of LDs observed was different from that previously reported in terms of *PEX14*  
312 influence on lipid metabolism in mammalian cells. Yin *et al.* performed a microarray analysis in  
313 human liposarcoma SW782 cells to identify genes upregulated during the late stages of  
314 adipogenesis (Yin et al., 2014). Of the 11 mRNAs that showed a greater than 10-fold increase,  
315 one was *PEX14* (Yin et al., 2014) This is similar to what was observed in our RNA-SEQ  
316 comparison of S2 cells cultured in Standard and +Oleate conditions (Supplementary Tables 1-2,  
317 Figure 2C). Other groups similarly found *PEX14* upregulation during adipocyte differentiation in  
318 SW872 cells (Zhu et al., 2014). This was assumed to be a prelude to peroxisome proliferation.  
319 However, we found that peroxisome number does not increase in +Oleate cells and expression of  
320 other Pex genes needed for making new peroxisomes (*e.g.*, *Pex2*) did not change (Supplementary  
321 Tables 1-2, Figure 2A-C). This suggests that the LD-associated activity of Pex14 we identified is  
322 distinct from previously characterized roles in peroxisome biogenesis.

323 LD storage and metabolism is a dynamic process. LD formation occurs even as existing  
324 TG stores are broken down by lipases at existing LDs (Hashemi and Goodman, 2015). DGs  
325 produced by TG hydrolysis can be re-esterified by DGATs to form new TG that is incorporated  
326 into new (initial) LDs (Wilfling et al., 2013). In +Oleate S2 cells, previous RNAi knockdown of  
327 *Pex14* suppressed changes in LD volume or number (Figure 3G-H). However, when +Oleate

328 cultured cells were then transferred to Lipolytic conditions, *Pex14* RNAi knockdown reduced  
329 LD volume and increased LD number, characteristic of fragmentation that occurs when lipases  
330 are active (Figure 3G-H). In addition, larger LDs were observed in cells in Lipolytic conditions  
331 compared to +Oleate conditions. Thus, it is possible that the LDs observed in cells treated with  
332 *Pex14* RNAi represent new LDs formed from re-esterification of produced by TG lipolysis. In  
333 addition, larger LDs were observed in cells in Lipolytic conditions compared to +Oleate  
334 conditions. Thus, this increase in LD volume in Lipolytic conditions is likely the result of re-  
335 esterification of DG to TG at existing LDs. In other organisms, DGAT isoforms are localized to  
336 LDs (McFie et al., 2011) and the FATP1-DGAT2 complex facilitate LD expansions (Xu et al.,  
337 2012). Further supporting a role for *Pex14* promoting TG storage, LDs in cells overexpressing  
338 both *Pex14* and *Hsl* were significantly larger than those found in cells overexpressing *Hsl* alone  
339 (Figure 5G-H). This would lead to elevated levels of DG as endogenous Bmm hydrolyzed TG.  
340 Given that DG can be re-esterified to TG at the LD surface by an LD-localized isoform of  
341 DGAT2 (Stone et al., 2009) in other species, if a similar mechanism is conserved in *Drosophila*,  
342 this would cause LD TG stores to be maintained, increasing increase in LD volume.  
343 *Diacylglycerol O-acyltransferase 2 (Dgat2)* is an apparent *DGAT2* homologue, although no  
344 functional studies have been performed to confirm similar function, so this possibility is not  
345 currently testable. Functional testing of this model awaits functional and biochemical  
346 characterization of *Dgat2* in *Drosophila*.

347       The relative increased in TG (glycerol) levels in Lipolytic cells treated with *Pex14* RNAi  
348 (Figure 3I), supports a model that *Pex14* at LDs suppresses lipase activity. This model is also  
349 supported by observations that LD volume in the fat body and overall TG content is significantly  
350 reduced when *Pex14* is knocked down by RNAi in the larval fat body (Figure 1E). The role of

351 Pex3 and Pex13 in this process also need to be further examined. Pex13 is predicted to interact  
352 directly with Pex14 (Schell-Steven et al., 2005). *Pex13* RNAi knockdown in the larval fat body  
353 also caused reduced fat storage and reduced survival on minimal nutrition food supplemented  
354 with excess lipid (Figure 1I). The effect of Pex13/Pex14 on larval survival is most likely related  
355 to the effect on lipid storage as RNAi knockdown of *Pex1*, which would strongly affect  
356 peroxisome biogenesis had little effect on survival when animals were fed a high-fat diet (Figure  
357 1I). Larvae consuming lard food would have increased levels of circulating fatty acids secreted  
358 from cells of the gut and stored in fat body (Musselman and Kuhnlein, 2018). *Pex14 RNAi*  
359 treatment likely upsets the regulatory balance at LDs in the fat body leading to lipotoxicity.  
360 *Pex16* RNAi knockdown blocked Pex14 association with both LDs and peroxisomes (Figure  
361 4D). Pex16 and Pex19 shown previously to have roles in inserting Pex14 into the membrane of  
362 peroxisomes or PPVs (Aranovich et al., 2014; Kim et al., 2006; Sacksteder et al., 2000).  
363 Conversely, loss of Pex19 leads to an increased proportion of Pex14 localized to LDs in +Oleate  
364 cultured cells (Figure 4B) Previous studies have shown that *Drosophila Pex19* mutant larvae  
365 have elevated activity of cytoplasmic (non LD-associated) lipases, mitochondrial dysfunction  
366 and lipotoxicity (Bulow et al., 2018), consistent with the role we identified for Pex19 in directing  
367 Pex14 to LDs which would contribute to systemic defects in lipid metabolism.

368       Localization of the Pex3, Pex13, and Pex14 to LDs occurs within 24h after cells are  
369 placed in +Oleate conditions. Pex14 in the LD proteome is largely synthesised during the first  
370 24h (Figure 3Q-S). Further, we find that LD-associated Pex14 is distinct from markers of mature  
371 peroxisomes (Figure 2E) or from mitochondria (Figure 4C). The C-terminal region of Pex14,  
372 Pex14<sup>117-280</sup> is sufficient to mediate LD association in +Oleate cultured cells (Figure 4L).  
373 However, LD association is abrogated if the Pex14 C-terminal region does not include the

374 transmembrane domain (Figure 4M). Pex14 is a known bilayer transmembrane protein (Azevedo  
375 and Schliebs, 2006; Will et al., 1999) so it is extremely unlikely that the transmembrane domain  
376 (Figure 4G) could be inserted into the LD phospholipid monolayer (Fujimoto and Parton, 2011).  
377 Thus, the requirement for the TM domain (Figure 4, G-M), the co-recruitment of Pex3 and  
378 Pex13 (Figure 3 V-W), the similar phenotypes associated with knockdown of Pex3, Pex13 and  
379 Pex14 in the fat body (Figure 1A) and direct TEM visualization of PEX14 localization (Figure  
380 6K-M) supports a model whereby Pex14 at LDs is associated with PPVs.

381 Pex3, Pex13, and Pex14 are all bilayer membrane spanning proteins inserted into PPVs,  
382 in a process that likely requires Pex19 (Götte et al., 1998; Pinto et al., 2006). When inserted into  
383 the peroxisome membrane, the Pex14 C-terminal domain faces the cytoplasm (Barros-Barbosa et  
384 al., 2019; Reuter et al., 2021). One possible model is that Pex14 at the LD surface is embedded  
385 within vesicles and the C-terminal of Pex14 interacts with an LD-resident protein, or that the C-  
386 terminal of Pex14 that can interact directly with the LD surface. However, analysis of the C-  
387 terminal region of Pex14 did not identify sequence motifs like Class I or Class II LD interacting  
388 proteins (Kory et al., 2016). Immuno-TEM of NRK cells showed that LD-associated PEX14 is  
389 associated with small vesicles adjacent to LD population (Figure 6K-L). These vesicles are  
390 approximately 40-50 nm in diameter, within the range of the size predicted for PPVs (van der  
391 Zand et al., 2012). One class of mammalian PPVs is defined by the presence of Pex3 and Pex14  
392 in the membrane (Agrawal and Subramani, 2016; Schrader and Pellegrini, 2017; Sugiura et al.,  
393 2017). Further examination as the path taken within the cell Pex3, Pex13, and Pex14 from  
394 synthesis in the cytosol to the LD surface in +Oleate cells is needed to determine at what stage  
395 these proteins are diverted from the canonical peroxisome biogenesis pathway to LDs.

396 Supporting the model that the C-terminal of Pex14 associates with the LD surface via



397 interaction with other LD-associated proteins is the observation that changes in the amount of  
398 perilipins affects LD localization of Pex14, as well as Pex3 and Pex13. Overexpression of *Lsd-1*  
399 blocked the localization of Pex3, Pex13, and Pex14 to the LD surface in S2 cells (Figure 5I, M-  
400 N), while elevated *Lsd-2* levels promoted Pex14 association with LDs (Figure 5J). A major  
401 mechanism regulating association of proteins with the LD surface is inter-molecular competition  
402 for limited space as the LD grows with addition of TG and shrinks with TG lipolysis (Kory et al.,  
403 2015). As the LD surface shrinks during TG lipolysis proteins are preferentially removed from  
404 the LD surface to create space for proteins like lipases (Kory et al., 2015). The exclusion of  
405 Pex14 from LDs when *Lsd-1* levels are elevated (Figure 5I) suggests this is occurring. As  
406 overexpression of *Lsd-2* does not affect Pex14-LD localization, the effect of *Lsd-1*  
407 overexpression on Pex14 is likely specific, rather than a general effect. Spatial analysis of the  
408 positioning of proteins at surface of individual LDs is needed to define the relative contributions  
409 of protein-protein interaction to recruitment of Pex14 (or Pex3 or Pex13) to LDs. Phosphorylated  
410 *Lsd-1* helps recruits Hsl to the LD surface during lipolysis in *Drosophila* (Bi et al., 2012). This is  
411 notable as we have observed that overexpression of Pex14 blocks recruitment of Hsl to the LD  
412 surface (Figure 5C-D).

413 A role for Pex14 in promoting TG storage in LDs is also supported by differences in  
414 interaction between Pex14 and LD-associated lipases. The major circulating neutral lipid in  
415 *Drosophila* is DG which is accumulated in the fat body for energy storage (Heier and Kühnlein,  
416 2018). While Pex14 levels at the LD have little effect on the TG lipase Bmm, Pex14 antagonizes  
417 Hsl at the LD (Figure 5A-H). This supports a model whereby recruitment of Pex14 to the LD  
418 surface perturbs the interaction between Hsl and *Lsd-1*, blocking the recruitment of Hsl to the  
419 LD. This model is consistent with the antagonistic effects of overexpression of *Lsd-1* on Pex14-



420 LD localization (Figure 5I). Further studies are required to determine the mechanism by which  
421 Pex14 perturbs Hsl recruitment to LDs.

422 Finally, pulse-chase labelling of newly synthesised protein showing that newly  
423 synthesized Pex14 is directed to LDs (Figure 3R-S) and the effect of Pex19 loss on enhanced  
424 trafficking of Pex14 (Figure 4E-F) to LDs suggests that LD-localized Pex14 in cells transferred  
425 to +Oleate conditions comes from a pool of protein newly translated in the cytosol rather than the  
426 pre-existing pool associated with mature peroxisomes. This model of newly translated Pex14  
427 being directed to newly formed LDs in +Oleate cells is also consistent with the observed  
428 upregulation of *Pex14* upon transfer to +Oleate culture conditions (Figure 2B) and the lack of an  
429 effect on other Pex genes on fat body lipid levels when knocked down by RNAi (Figure 1A-F).

430 It remains unclear when and how newly synthesized Pex14 is trafficked to the LD. Given  
431 the absence of peroxisome proliferation observed in S2 cells transferred to +Oleate conditions,  
432 may be that Pex14 newly synthesised in the cytoplasm is diverted from peroxisome proliferation  
433 to the LD serving to coordinate these two critical organelles needed for cellular lipid  
434 homeostasis. As Pex13 and Pex14 are both inserted into PPVs post-translationally via the  
435 activity of Pex3, Pex16 and Pex19 (Giannopoulou et al., 2016; Jansen and van der Klei, 2019)  
436 the co-localization and/or functional requirement for each in trafficking Pex14 to LDs suggest  
437 that this stage is also required. However, when Pex19 is absent, Pex14 localization to LDs is  
438 increased; however, this could also be a function of ablation of peroxisome proliferation in  
439 general unbalancing the balance between trafficking Pex13 and Pex14 to each organelle. Clearly,  
440 additional experiments will be required to clearly elucidate the transport pathway of Pex3,  
441 Pex13, and Pex14 to the LD surface.

## 442 **Materials and methods**

### 443 *Cell culture*

444 'Standard' conditions for S2 and Pex19KO S2R+ cell culture: Schneider's Medium  
445 (Sigma Aldrich S0146) containing 10% FBS (Thermo Fisher, 12483-012) at 25°C. The Standard  
446 culture conditions for Huh7 or NRK cells were Dulbecco's Modified Eagle's Medium (Sigma  
447 Aldrich D5796) containing 10% FBS at 37°C and 5% CO<sub>2</sub>. Both were supplemented with 100U  
448 penicillin per ml and 100µg streptomycin per ml (Thermo Fisher 15140-122). S2, S2R+, Huh7  
449 and NRK cells were passaged in a log phase before they reached confluency. Cultures were not  
450 used beyond passage 25. The +Oleate culture conditions used in this study are the same as used  
451 previously to study LDs in S2 cells (Guo et al., 2008; Krahmer et al., 2011), These are the same  
452 as Standard conditions except that the medium was supplemented with 1 mM oleate (+Oleate,  
453 Sigma Aldrich O1008) bound to fatty acid free BSA (Sigma Aldrich A8806). Cells were  
454 maintained in 1 mM oleate-supplemented (+Oleate) conditions for 24 or 48h. To induce lipolysis  
455 of LD-stored TGs, ('Lipolytic' conditions), cells were first cultured for 24h in +Oleate  
456 conditions. Cells were then washed 1x in fresh non-supplemented medium and subsequently  
457 incubated in medium without FBS or oleate for 24. The +Oleate and Lipolytic culture conditions  
458 were shown previously to induce LD biogenesis and subsequent lipolysis were first described in  
459 Guo et al. (Guo et al., 2008).

### 460 *Generation of a polyclonal antiserum recognizing Drosophila Pex14.*

461 A pENTR-D clone of the full-length Pex14 open reading frame (Baron et al., 2016) was  
462 transferred to pDEST-17 (Thermo Fisher) using LR ClonaseII (Thermo Fisher 11791-020). This  
463 was transfected into BL21-AI *E. coli* (Thermo Fisher C6070-03). Expression of 6xHis-Pex14  
464 was induced in 500 ml cells grown to OD<sub>600</sub>-0.4 at 37°C by addition of 0.2% L-arabinose and

465 further culture at 25°C for 3h. The bacterial cells were lysed by incubation in 8M Urea, and the  
466 lysate cleared by centrifugation 20000xG for 30 min at 25°C. The cleared lysate was applied to a  
467 1ml HisTrap column (Cytavia 17524701), using the Akta-Start His-tagged purification protocol  
468 (Cytavia). Purified protein was eluted using a stepwise Imidazole gradient. Fractions containing  
469 purified Pex14 were combined, placed in dialysis tubing (8000 MWCO, Spectrum 132660), and  
470 desalted by buffer exchange in 5L 1x PBS overnight. The protein sample was concentrated in an  
471 Amicon Ultra 15 centrifugal filter (Millipore Sigma, UFC900308) to a concentration 1mg/ml and  
472 injected into Guinea Pigs (Pocono Rabbit Farms and Laboratories). Partially purified serum was  
473 tested for antigen specificity by western blot against purified protein, S2 cells, S2 cells  
474 expressing Pex14-GFP fusions and *Pex14* RNAi treated S2 cells.

#### 475 *Drosophila strains*

476 The *w<sup>1118</sup>* strain was obtained from the Bloomington *Drosophila* Stock Center (BDSC).  
477 RNAi lines used include All crosses were performed at 25°C. UAS-dsRNA lines were obtained  
478 from Vienna *Drosophila* Stock Centre: *Pex1*, GD12029v27741, VDRC:v27741; *Pex2*,  
479 KK101378, VDRC:v108578; *Pex3*, GD2464v11017, VDRC:v11017; GD2464v12426,  
480 VDRC:v109619; *Pex5*, GD14972v42332, VDRC:105654; *Pex12*, GD11036v34671,  
481 VDRC:34671; *Pex11a/b*, KK101579, VDRC:v105654; *Pex13*, GD1977v39544,  
482 VDRC:v39544; KK100165, VDRC:v108829; *Pex14*, GD2759v42590, VDRC:v42590; *Pex16*,  
483 KK107609, VDRC:v110614; *Pex19*, GD11608v22064, VDRC:v22064;, KK108370,  
484 VDRC:v100746 or BDSC: *Pex11a/b*, TRiP.HMS02576, BDSC:42883; *Pex12*,  
485 TRiP.HMC03536/TM3, BDSC:53308; *Pex13*, TRiP.HMC03099, BDSC:50697; *Pex14*, TRiP.  
486 HMC06491, BDSC:79826; *Pex16*, TRiP.HMC04810, BDSC:57495; *Pex19*,  
487 TRiP.HMC03104/TM3(Ubi-GFP), BDSC:50702. Driver lines used were:  $y^1 w^*$ ; P{w<sup>+mC</sup>=r4-

488 GAL4}3 BDSC:33832 or Kyoto Drosophila Stock Center: y<sup>1</sup> w<sup>\*</sup>; P{TubP-GAL4}LL7/TM3(Ubi-  
489 GFP) ,Sb<sup>1</sup> KDSC 108069. UAS-Stinger GFP:3:r4-GAL4 was used as a control for RNAi  
490 knockdown screen crosses. For flies over TM3(Ubi-GFP), non-GFP flies were selected. Fly  
491 stocks were maintained on the BDSC standard cornmeal food recipe, unless specified. Fly strains  
492 were passaged once per week to prevent overcrowding.

### 493 *Cloning*

494 S2 cell expression clones for Myc or FLAG tagged Pex proteins were described  
495 previously (Baron et al., 2016). For expression of epitope-tagged lipid-droplet associated  
496 proteins, cDNA libraries were made from mRNA harvested from *Drosophila* embryos at 2-4, 4-  
497 6, and 10-14h after egg laying and reverse transcribed using oligo-dT primers with a One-Step  
498 RT kit (Bio-Rad 1725140). The coding sequence for each gene encoding a gene of interest was  
499 amplified from a cDNA template using Phusion High Fidelity DNA polymerase (Thermo Fisher  
500 F-530XL). Full-length coding sequences were amplified for N-terminal tagging of proteins,  
501 respectively. Pex14 truncations were similarly generated by PCR of bases 349-840, (aa117-280)  
502 and 148-280 (aa 442-840). Pex14 1-444 (aa 1-148) was cloned without a stop codon for C-  
503 terminal tagging. Blunt-end purified PCR products with a CACC motif at the 5' end were  
504 directionally cloned into the pENTR/D Gateway entry vector by TOPO cloning (Thermo Fisher  
505 K240020). The sequences of the inserted regions were verified by Sanger sequencing at the U of  
506 Alberta Molecular Biology Facility. These were recombined into pAFW or pAMW destination  
507 vectors for N-terminal tagging or pAWM for C-terminal tagging, which are part of the  
508 *Drosophila* Gateway Vector Collection, (originally developed by Terence Murphy, Cornell  
509 University) using LR ClonaseII.

510 *Transfections*

511 Plasmids containing a tagged gene of interest were transfected into *Drosophila* S2 cells  
512 using Effectene transfection reagent following the manufacturer supplied protocol (Qiagen  
513 301425). S2 cells were passaged 24h before transfection. Approximately  $5.0 \times 10^5$  cells were  
514 transfected with 150 ng of plasmid DNA. Transfected S2 cells were incubated at 25°C for 48-72h  
515 before fixation for imaging.

516 *<sup>35</sup>S metabolic pulse-chase labelling*

517 To label newly synthesised protein in S2 cells, a formulation of Schneider's medium  
518 (Schneider, 1972) that did not contain L-methionine, L-Cysteine or yeast extract was made from  
519 stock chemicals (Sigma-Aldrich). It was supplemented with 10% dialyzed FBS (Thermo Fisher  
520 A33820) and 100µl Easy Tag Express <sup>35</sup>S Methionine/Cysteine (Perkin Elmer NEG 772002MC)  
521 at either 0 or 24h after transformation with a 6xMyc-Pex14 (pAMW-Pex14) as described above.  
522 1mM oleate was added at 24h after transformation as described above. For cells where <sup>35</sup>S was  
523 added at 0h, they were washed in complete Schneider's medium (Schneider, 1972) at 24h. For  
524 cells where <sup>35</sup>S Methionine/Cysteine mix was added at 24 h, these were washed in Schneider's  
525 medium at 72h. Cells were pelleted at 72h and rinsed with PBS containing Complete protease  
526 inhibitor cocktail (Millipore 04693159001) and fractionated as described below. The relative  
527 proportion of 6xcMycPex14 was analyzed by immunoprecipitation from each fraction and  
528 detected by autoradiography or western blotting.

529 *Imaging*

530 S2 cells were observed using a Zeiss 63x oil immersion objective (NA = 1.4) on a Zeiss  
531 Axio Observer M1 microscope with an ERS spinning disk confocal and a C9100 EMCCD  
532 camera (Hamamatsu) using Volocity imaging software (PerkinElmer) or a Zeiss LSM700

533 confocal and Zen software (Zeiss). Image stacks were captured at 130µm vertical (z) spacing  
534 (ERS) or 25nm (LSM700). S2 cells were fixed in 4% paraformaldehyde dissolved PBS and  
535 blocked with 3% bovine serum albumin (BSA). Cells were incubated for one hour with anti-  
536 FLAG M2 monoclonal mouse primary antibody (Sigma-Aldrich F3165), anti-Myc rabbit  
537 primary antibody (Sigma Aldrich SAB4301136), anti-Pex14 Guinea pig primary antibody  
538 (Simmonds lab), anti-Abcd3 rabbit primary antibody (Simmonds lab), anti-cytochrome (BD  
539 Pharmingen, Clone 7H8.2C12) mouse primary antibody and anti-SKL rabbit primary antibody  
540 (Baron et al., 2016). The first two primary antibodies were used at a 1:200 dilution, and the last  
541 four were used at 1:1000, 1:500, 1:500 and 1:250, respectively. In cases where 6xMyc-tagged  
542 proteins were analyzed relative to peroxisomes, anti-Myc mouse primary monoclonal antibodies  
543 9E10 (obtained from Dr. Paul Lapointe, University of Alberta) or 9B11 (Cell Signalling 2276S)  
544 were used at a 1:250 dilution. Primary antibody incubation was followed by incubation with  
545 Alexa Fluor 568 anti-mouse goat secondary antibody and Alexa Fluor 488 anti-rabbit secondary  
546 antibody, both at 1:2000 dilution. Cells were imaged as above.

547       To detect LDs, cells were stained with HCS LipidTOX Deep Red at 1:500 dilution for  
548 one hour after secondary antibody incubation. For larval fat body staining, fat bodies from third  
549 instar larvae were dissected and fixed in 4% paraformaldehyde for 15 minutes. The tissue was  
550 rinsed three times in PBS. The tissue was then stained with Nile Red (Thermo Fisher) and 4,6'-  
551 diamidino-2-phenylindole (DAPI) at a 1:1000 and 1:500 dilutions, respectively. Tissues were  
552 mounted on slides with Prolong Gold (Thermo Fisher, P36930) mounting medium and imaged.  
553 NRK and Huh7 cells were fixed in 4% paraformaldehyde and blocked in 3% BSA for one hour.  
554 Cells were incubated in rabbit anti-PEX14 primary antibody (Thermo Fisher PA5-78103) and  
555 mouse anti-peroxisome membrane protein 70 / ATP-binding cassette, subfamily D, member 3

556 (ABCD3) primary antibody (Richard Rachubinski, University of Alberta) at 1:200 dilutions, for  
557 one hour. Primary antibody incubation was followed by incubation with Alexa Fluor 568 anti-  
558 mouse goat secondary antibody, or Alexa Fluor 488 anti-rabbit secondary antibody (Abcam  
559 ab175473 and ab150077), Alexa Fluor Cy3 anti-Guinea Pig secondary antibody (Jackson  
560 ImmunoResearch 706-165-148), and Alexa Fluor 488 anti-mouse secondary antibody, and Alexa  
561 Fluor 594 anti-mouse secondary antibody, all at 1:2000 dilutions. Nile Red (Sigma Aldrich  
562 3013) or LipidTOX Deep Red (Thermo Fisher H34477) were used at 1:500 dilution to stain LDs.  
563 Cells were imaged with a 63x objective lens, as above. The images shown best represent the  
564 quantitative data that accompanied them. In Figures 1 -2, images were quantified from six  
565 biological replicates. In Figures 3, 4G-J, 5-10 images are representative of three biological  
566 replicates. Figure 4 images are representative of four biological replicates.

#### 567 *Image processing and quantification*

568 Image stacks of individual confocal images comprising the entire cell volume were  
569 processed to remove noise and reassign blur using a classical maximum likelihood estimation  
570 confocal algorithm provided by Huygens Professional Software (Scientific Volume Imaging) and  
571 an experimentally determined point spread function constructed from multiple images of 0.1 $\mu$ m  
572 Tetraspeck beads (Thermo Fisher T7279). Three-dimensional-based colocalization analysis  
573 using Pearson's coefficient was performed with Huygens Professional Software (Scientific  
574 Volume Imaging). In this case, colocalization is defined as the co-occurrence of two fluorophores.  
575 This was quantified using Pearson's coefficient whereby a value of +1.00 (100%) denotes  
576 complete colocalization and 0 (0%) denotes the absence of any colocalization (Adler and  
577 Parmryd, 2010). Peroxisome or LD volume and average number of peroxisomes or LDs per cell  
578 were calculated using IMARIS v8 (Oxford Instruments). To estimate what percentage of the co-

579 localization signal was due to background fluorescence, measurements were also calculated on  
580 images where one channel was shifted 90°, relative to the other (Dunn et al., 2011). In all cases,  
581 background co-localization measured in the shifted images were never greater than 10%. For  
582 quantification of PEX14 immunolocalization on TEM images, the distance between PEX14-  
583 positive signals and LDs was measured and reported based on the proportion of the total PEX14  
584 signal within a given image (Figure 6M). These distances were grouped into six ranges: 0-40 nm,  
585 41-80 nm, 81-120 nm, 121-160 nm, 161-200 nm, and 200+ nm.

586         Organelle volume and number were measured using the Surfaces function as follows: the  
587 specific channel for the appropriate organelle marker was selected. A Gaussian filter was applied  
588 by selecting “Smooth” and the surfaces detail was set to 0.1µm. Thresholding was set to  
589 “Background Subtraction (Local Contrast)”. The diameter of the smallest organelle signal to be  
590 included in the measurement was measured in the “Slice” mode, and the value was inputted into  
591 the Surfaces creator below “Background Subtraction”. A surface was created, and the  
592 background signal was removed by adjusting the slider in the Surfaces creator. Finally, surfaces  
593 were created by selecting the green arrow to perform the appropriate calculations. Values were  
594 found under the “Statistics” tab, which gives the total number of surfaces (organelle number).  
595 Organelle volume was given by selecting “Average values”.

596         In Figure 2F, peroxisome number values represent averages based on 10 cells measured  
597 from three biological replicates, for a total of 30 cells measured. In Figures 2 E, G-H,  
598 peroxisome and LD volume and number values represent averages based on five cells measured  
599 from six biological replicates, for a total of 30 cells measured. In Figure 5F, LG volume values  
600 represent averages based on six images measured from three biological replicates, for a total of  
601 18 imaged measured. In Figure 5K-L, colocalization values represent averages based on five



602 cells measured from four biological replicates, for a total of 20 cells measured. In Figure 6E-F,  
603 colocalization values represent averages based on five cells measured from three biological  
604 replicates, for a total of 15 cells measured. For statistical analysis of all colocalization and  
605 organelle volume/number data, an unpaired Student's *t*-test was performed using Prism 7  
606 software (GraphPad).

607 For Figure 4G-H, spectral imaging and linear unmixing were performed using Zen  
608 software (Zeiss). The two dyes, Alexa Flour 594 and Cy3 were imaged using Lambda Mode with  
609 wavelengths between 521.0 to 630.0nm and the number of channels were adjusted until width  
610 was 10nm. In the Unmixing tab, Auto find/ACE (Automatic Component Extraction) was  
611 selected to extract 7 spectral components in the acquired image. The appropriate ACE channel  
612 were selected and deconvolved as above. The DAPI, neonGreenand LipidTOX deep red images  
613 were acquired separately using standard filter settings.

#### 614 *dsRNA treatments*

615 dsRNA amplicons were made from an existing template library (Foley and O'Farrell,  
616 2004). RNA was amplified using a T7 RNA Polymerase (Thermo Fisher, EP0111). S2 cells were  
617 passaged 24h prior to dsRNA treatments. Cells were treated with dsRNA using Effectene  
618 Transfection Reagent (Qiagen 301425) to enhance uptake. S2 cells were incubated for 72h at  
619 25°C before further processing. A scrambled dsRNA amplicon was used as a control (Forward  
620 primer sequence: GTGAAGAGGTCAGAGGCCTG; Reverse primer sequence:  
621 ACAGTCTAGCGTTCCTTGAGG.

#### 622 *qRTPCR analysis*

623 RNA was isolated from S2 cells using the RNeasy Plus Mini Kit (Qiagen 74134). RNA  
624 was reverse transcribed using the Maxima H minus system (Thermo Fisher K1681).

625 Quantification of each transcript was performed using Perfecta SYBR Green FastMix  
626 (QuantaBio 95118) and an Eppendorf MasterCycler RealPlex2. All samples were measured in  
627 triplicate and calculations were made relative to Ribosomal Protein L30 (RpL30) expression.  
628 Primers used for each of the target genes were previously experimentally validated pairs reported  
629 in FlyPrimerBank (Hu et al., 2013). For all qRTPCR experiments, values reported are averages  
630 based on three biological replicates. Statistical significance was determined by unpaired  
631 Student's *t*-test or one-way ANOVA test using Prism 7 software (GraphPad).

### 632 *RNA-SEQ and analysis*

633 Total RNA was isolated from S2 cells cultured in Schneider's or Schneiders +Oleate  
634 culture conditions using an RNeasy Plus Mini Kit. RNA integrity was verified using an Agilent  
635 RNA Nano assay (Agilent Genomics 5067-1511). Ribosomal RNA was subtracted from samples  
636 using a Ribo-Zero Gold rRNA Removal Kit (Illumina 20040526). Libraries were prepared using  
637 a NEBNext Ultra RNA Library Prep Kit and NEB Next Multiplex Oligos (New England Biolabs  
638 E7530L and E7335L). Library quality and size distribution was confirmed by running an Agilent  
639 High Sensitivity DNA assay (Agilent Genomics 5067-4626), and the average size of library  
640 inserts was verified to be 290 - 300 base pairs. 10pM of each of the libraries were loaded onto an  
641 Illumina MiSeq v2 300 cycle kit (2 x 150 cycles, paired-end reads, MS-102-2003). Each culture  
642 condition was analyzed in triplicate. Paired-end reads were aligned to the *Drosophila*  
643 *melanogaster* genome (6.28 release) HiSat2 (Kim et al., 2015). Individual read counts were  
644 mapped to specific genes using HTSeq (Anders et al., 2015). Reads with less than one count per  
645 million in at least three samples were filtered out (Pertea et al., 2016). Differential analysis was  
646 performed using a pipeline that correlated EdgeR (Robinson et al., 2010) and DESeq2 (Love et  
647 al., 2014) modified from the SARTools pipeline (Varet et al., 2016). Transcripts that were found

648 to have differential expression in both alignment and differential expression models ( $\text{padj} > 0.1$ )  
649 were considered for subsequent analysis.

#### 650 *Larval buoyancy assays*

651 Approximately four days after egg-laying, late 3<sup>rd</sup> instar larvae were removed from their  
652 vials, rinsed in sterile PBS and suspended in a 12% sucrose solution, as per Reis *et al.* (Reis *et*  
653 *al.*, 2010). Larvae were scored by their propensity to float in the sucrose solution. In each trial,  
654 10 larvae were analyzed. Three biological replicates were performed for each sample, for a total  
655 of 100 larvae analyzed. For analysis of Pex14 GD2759v42590, 10 individual replicates were  
656 performed, and statistical significance was measured by unpaired Student's *t*-test using Prism 7  
657 software (GraphPad).

#### 658 *TG / glycerol quantification*

659 At approximately 4 days after egg-laying, 3<sup>rd</sup> instar larvae were removed from their vials  
660 and rinsed in sterile PBS. Lysates were made by homogenizing tissue in 5% NP-40 in distilled,  
661 deionized water. Samples were heated at 80°C for 5 minutes, cooled to room temperature, and  
662 centrifuged to remove any insoluble material. TG measurements from each sample were made  
663 using a Triglyceride Assay Kit (Abcam, ab65336), as per the manufacturer's instructions.  
664 Fluorometric detection was made at 587 nm using a BioTek Synergy 4 plate-reader with Gen 5  
665 software. TG measurements were made relative to the protein concentration of each sample,  
666 measured using the Pierce BCA Protein Assay Kit (Thermo Fisher 23225). Lysates were made  
667 from 10 larvae for each trial. The values reported are averages from three biological replicates.  
668 Statistical significance was measured by unpaired Student's *t*-test using Prism 7 software  
669 (GraphPad).

670 The glycerol content of cell culture media was quantified using a Glycerol Assay Kit

671 (Sigma Aldrich MAK117) according to the manufacturer's protocol. S2 cells were pelleted by  
672 centrifugation, and the resulting Schneider's medium was removed. Each sample was diluted  
673 1:1000 in water. The assay was performed per the manufacturer's instructions, and end-point  
674 fluorescence was measured at 587 nm in a BioTek Synergy 4 plate-reader with Gen 5 software.  
675 Glycerol measurements were made relative to the protein content in each sample, measured  
676 using a Pierce BCA Protein Assay Kit (Thermo Fisher 23225). For protein measurements, cells  
677 were lysed in Mild Lysis Buffer (20 mM HEPES pH 7.0, 50 mM NaCl, 1 mM EDTA, 0.5 mM  
678 EGTA, 10 mM DTT, 1.0% Triton X-100, protease inhibitors), and protein measurements were  
679 taken, as per manufacturer's instructions. Colorimetric absorption was measured at 562 nm using  
680 a BioTek Synergy 4 plate-reader with Gen 5 software. The values reported are based on averages  
681 from six biological replicates. Statistical significance was determined using any unpaired  
682 Student's *t*-test (Prism 7 software, GraphPad).

### 683 *Larval survival assay*

684 For the lipotoxicity experiments shown in Figure 1 I, early 3<sup>rd</sup> instar larvae were  
685 transferred to standard cornmeal food to holidic food (Piper et al., 2014) or lard food prepared as  
686 holidic food with the addition of lard at 22.2 g/L. For each trial, 10 3<sup>rd</sup> instar larvae from each  
687 genetic cross were transferred to holidic food or lard food. The values shown are averages from  
688 five individual genetic crosses, for a total of 50 larvae examined from each genetic cross.

### 689 *Subcellular fractionation*

690 LDs were isolated from transfected S2 cells, as described (Krahmer et al., 2011; Krahmer  
691 et al., 2013). In brief, cells from a T25 flask were pelleted, washed in cold PBS, and resuspended  
692 in 2ml of buffer (200 mM Tris/HCl pH7.5, 2mM magnesium acetate) with protease inhibitors  
693 (Roche). The cells were lysed using a cell homogenizer and a 10- $\mu$ m ball bearing (isobiotec).

694 The lysates were then cleared by centrifugation at 1,000x g for 10 minutes. 1 ml of cleared lysate  
695 was adjusted to 1.08 M sucrose, and a step gradient of sucrose was layered on top with 2ml of  
696 0.27M sucrose, followed by 2ml of 0.135M sucrose. Finally, one ml of 0M sucrose buffer was  
697 layered at the top. Samples were spun at 100,000x g for 90min at 4°C in an ultracentrifuge using  
698 an SW41 rotor. The floating LD fraction was isolated, and the proteins within the fraction were  
699 precipitated by methanol: chloroform extraction, (Wessel and Flügge, 1984). In brief, 2 ml of  
700 methanol and 500µL of chloroform was added to 500µL of LD fraction isolate. The mixture was  
701 vortexed and centrifuged at 9,000x g for 10 seconds. 1.5 ml of ddH<sub>2</sub>O was added, and the  
702 mixture was again vortexed and centrifuged at 14,000x g for one minute. The top aqueous layer  
703 was removed, and an additional 2 ml of methanol was added and vortexed. The sample was  
704 centrifuged at 20,000x g for 5min to pellet the protein. The methanol was carefully removed, and  
705 the protein pellet was dried. The dried protein pellet was resuspended in 30µL of gel sample  
706 buffer, boiled, and size separated by SDS-PAGE.

#### 707 *Immunoblotting*

708 Protein samples were boiled in gel sample buffer for 5 minutes, size separated by SDS-  
709 PAGE, and transferred to a nitrocellulose membrane (Bio-Rad 1620112). Membranes were  
710 blocked in Odyssey Blocking Buffer (LI-COR). For subcellular fractionation experiments,  
711 membranes were incubated with rabbit anti-Lsd-2 primary antibody (obtained from Dr. Michael  
712 Welte, University of Rochester) and mouse 9B11 (Cell Signalling 2276S) anti-MYC antibody.  
713 For the metabolic labelling experiments blots were re-probed with Rabbit anti SKL (Richard  
714 Rachubinski). For NRK cell lysates, membranes were probed with rabbit anti-PEX14 primary  
715 antibody (Thermo Fisher) and E7 mouse anti-β-tubulin primary antibody developed by  
716 Klymkowsky was obtained from the Developmental Studies Hybridoma Bank, created by the

717 NICHHD of the NIH and maintained at The University of Iowa, Department of Biology, Iowa  
718 City, IA 52242. Membranes were then probed with Alexa Fluor anti-rabbit A680 secondary  
719 antibody and Alexa Fluor anti-mouse A790 secondary antibody (Abcam ab175773 and  
720 ab175783). Membranes were visualized using an Odyssey Infrared Imaging System (LI-COR),  
721 and the band were quantified using Odyssey software (LI-COR). Western blots were  
722 representative of three independent biological replicates.  
723

724 **Acknowledgements**

725

726

727 **Competing interests**

728 No competing interests declared.

729

730 **Funding**

731 This work was supported by a Discovery Grant from the Natural Sciences and Engineering and

732 Research Council of Canada to AJS.

733

734 **References**

735 **Adler, J. and Parmryd, I.** (2010). Quantifying colocalization by correlation: the  
736 Pearson correlation coefficient is superior to the Mander's overlap coefficient. *Cytometry A*  
737 **77**, 733-42.

738 **Agrawal, G. and Subramani, S.** (2016). De novo peroxisome biogenesis: Evolving  
739 concepts and conundrums. *Biochim Biophys Acta* **1863**, 892-901.

740 **Anders, S., Pyl, P. T. and Huber, W.** (2015). HTSeq--a Python framework to work  
741 with high-throughput sequencing data. *Bioinformatics* **31**, 166-9.

742 **Anderson-Baron, M. N. and Simmonds, A. J.** (2019). Peroxisome Protein  
743 Prediction in *Drosophila melanogaster*. In *Proteomics of Peroxisomes: Identifying Novel*  
744 *Functions and Regulatory Networks*, vol. 89 (eds L. A. del Rio and M. Schrader), pp. 1-25.  
745 Singapore: Springer Nature Singapore Pte Ltd.

746 **Aranovich, A., Hua, R., Rutenberg, A. D. and Kim, P. K.** (2014). PEX16 contributes  
747 to peroxisome maintenance by constantly trafficking PEX3 via the ER. *J Cell Sci* **127**, 3675-  
748 86.

749 **Azevedo, J. E. and Schliebs, W.** (2006). Pex14p, more than just a docking protein.  
750 *Biochim Biophys Acta* **1763**, 1574-84.

751 **Baron, M. N., Klinger, C. M., Rachubinski, R. A. and Simmonds, A. J.** (2016). A  
752 Systematic Cell-Based Analysis of Localization of Predicted *Drosophila* Peroxisomal  
753 Proteins. *Traffic* **17**, 536-53.

754 **Barros-Barbosa, A., Rodrigues, T. A., Ferreira, M. J., Pedrosa, A. G., Teixeira, N.**  
755 **R., Francisco, T. and Azevedo, J. E.** (2019). The intrinsically disordered nature of the  
756 peroxisomal protein translocation machinery. *Febs J* **286**, 24-38.



757 **Beller, M., Bulankina, A. V., Hsiao, H. H., Urlaub, H., Jackle, H. and Kuhnlein, R.**  
758 **P.** (2010). PERILIPIN-dependent control of lipid droplet structure and fat storage in  
759 *Drosophila*. *Cell Metab* **12**, 521-32.

760 **Beller, M., Riedel, D., Jansch, L., Dieterich, G., Wehland, J., Jackle, H. and**  
761 **Kuhnlein, R. P.** (2006). Characterization of the *Drosophila* lipid droplet subproteome. *Mol*  
762 *Cell Proteomics* **5**, 1082-94.

763 **Bharti, P., Schliebs, W., Schievelbusch, T., Neuhaus, A., David, C., Kock, K.,**  
764 **Herrmann, C., Meyer, H. E., Wiese, S., Warscheid, B. et al.** (2011). PEX14 is required for  
765 microtubule-based peroxisome motility in human cells. *J Cell Sci* **124**, 1759-68.

766 **Bi, J., Xiang, Y., Chen, H., Liu, Z., Gronke, S., Kuhnlein, R. P. and Huang, X.** (2012).  
767 Opposite and redundant roles of the two *Drosophila* perilipins in lipid mobilization. *J Cell*  
768 *Sci* **125**, 3568-77.

769 **Binns, D., Januszewski, T., Chen, Y., Hill, J., Markin, V. S., Zhao, Y., Gilpin, C.,**  
770 **Chapman, K. D., Anderson, R. G. and Goodman, J. M.** (2006). An intimate collaboration  
771 between peroxisomes and lipid bodies. *J Cell Biol* **173**, 719-31.

772 **Bulow, M. H., Wingen, C., Senyilmaz, D., Gosejacob, D., Sociale, M., Bauer, R.,**  
773 **Schulze, H., Sandhoff, K., Teleman, A. A., Hoch, M. et al.** (2018). Unbalanced lipolysis  
774 results in lipotoxicity and mitochondrial damage in peroxisome-deficient Pex19 mutants.  
775 *Mol Biol Cell* **29**, 396-407.

776 **Chang, C.-L., Weigel, A. V., Ioannou, M. S., Pasolli, H. A., Xu, C. S., Peale, D. R.,**  
777 **Shtengel, G., Freeman, M., Hess, H. F., Blackstone, C. et al.** (2019). Spastin tethers lipid  
778 droplets to peroxisomes and directs fatty acid trafficking through ESCRT-III. *J Cell Biol*,  
779 jcb.201902061.

780           **Church, R. B. and Robertson, F. W.** (1966). Biochemical analysis of genetic  
781 differences in the growth of *Drosophila*. *Genet Res* **7**, 383-407.

782           **Darfler, F. J.** (1990). Preparation and use of lipid microemulsions as nutritional  
783 supplements for culturing mammalian cells. *In Vitro Cell Dev Biol* **26**, 779-83.

784           **Ducharme, N. A. and Bickel, P. E.** (2008). Lipid droplets in lipogenesis and  
785 lipolysis. *Endocrinology* **149**, 942-9.

786           **Dunn, K. W., Kamocka, M. M. and McDonald, J. H.** (2011). A practical guide to  
787 evaluating colocalization in biological microscopy. *American Journal of Physiology-Cell*  
788 *Physiology* **300**, C723-C742.

789           **Fakieh, M. H., Drake, P. J., Lacey, J., Munck, J. M., Motley, A. M. and Hettema, E. H.**  
790 (2013). Intra-ER sorting of the peroxisomal membrane protein Pex3 relies on its luminal  
791 domain. *Biol Open* **2**, 829-37.

792           **Foley, E. and O'Farrell, P. H.** (2004). Functional dissection of an innate immune  
793 response by a genome-wide RNAi screen. *PLoS Biol* **2**, E203.

794           **Fujimoto, T. and Parton, R. G.** (2011). Not just fat: the structure and function of the  
795 lipid droplet. *Cold Spring Harb Perspect Biol* **3**.

796           **Geuze, H. J., Murk, J. L., Stroobants, A. K., Griffith, J. M., Kleijmeer, M. J., Koster,**  
797 **A. J., Verkleij, A. J., Distel, B. and Tabak, H. F.** (2003). Involvement of the endoplasmic  
798 reticulum in peroxisome formation. *Mol Biol Cell* **14**, 2900-7.

799           **Giannopoulou, E. A., Emmanouilidis, L., Sattler, M., Dodt, G. and Wilmanns, M.**  
800 (2016). Towards the molecular mechanism of the integration of peroxisomal membrane  
801 proteins. *Biochim Biophys Acta* **1863**, 863-9.

802 **Götte, K., Girzalsky, W., Linkert, M., Baumgart, E., Kammerer, S., Kunau, W. H.**  
803 **and Erdmann, R.** (1998). Pex19p, a farnesylated protein essential for peroxisome  
804 biogenesis. *Mol Cell Biol* **18**, 616-28.

805 **Gronke, S., Mildner, A., Fellert, S., Tennagels, N., Petry, S., Muller, G., Jackle, H.**  
806 **and Kuhnlein, R. P.** (2005). Brummer lipase is an evolutionary conserved fat storage  
807 regulator in *Drosophila*. *Cell Metab* **1**, 323-30.

808 **Guo, Y., Walther, T. C., Rao, M., Stuurman, N., Goshima, G., Terayama, K., Wong,**  
809 **J. S., Vale, R. D., Walter, P. and Farese, R. V.** (2008). Functional genomic screen reveals  
810 genes involved in lipid-droplet formation and utilization. *Nature* **453**, 657-61.

811 **Hashemi, H. F. and Goodman, J. M.** (2015). The life cycle of lipid droplets. *Curr*  
812 *Opin Cell Biol* **33**, 119-24.

813 **Heier, C. and Kühnlein, R. P.** (2018). Triacylglycerol Metabolism in *Drosophila*  
814 *melanogaster*. *Genetics* **210**, 1163.

815 **Honsho, M., Yamashita, S. and Fujiki, Y.** (2016). Peroxisome homeostasis:  
816 Mechanisms of division and selective degradation of peroxisomes in mammals. *Biochim*  
817 *Biophys Acta* **1863**, 984-91.

818 **Hu, Y., Sopko, R., Foos, M., Kelley, C., Flockhart, I., Ammeux, N., Wang, X.,**  
819 **Perkins, L., Perrimon, N. and Mohr, S. E.** (2013). FlyPrimerBank: an online database for  
820 *Drosophila melanogaster* gene expression analysis and knockdown evaluation of RNAi  
821 reagents. *G3 (Bethesda)* **3**, 1607-16.

822 **Itabe, H., Yamaguchi, T., Nimura, S. and Sasabe, N.** (2017). Perilipins: a diversity  
823 of intracellular lipid droplet proteins. *Lipids Health Dis* **16**, 83.

824 **Itoh, R. and Fujiki, Y.** (2006). Functional domains and dynamic assembly of the  
825 peroxin Pex14p, the entry site of matrix proteins. *J Biol Chem* **281**, 10196-205.

826 **Jackson, C. L.** (2019). Lipid droplet biogenesis. *Curr Opin Cell Biol* **59**, 88-96.

827 **Jansen, R. L. M. and van der Klei, I. J.** (2019). The peroxisome biogenesis factors  
828 Pex3 and Pex19: multitasking proteins with disputed functions. *FEBS Lett* **593**, 457-474.

829 **Joshi, A. S. and Cohen, S.** (2019). Lipid Droplet and Peroxisome Biogenesis: Do  
830 They Go Hand-in-Hand? *Front Cell Dev Biol* **7**, 92.

831 **Joshi, A. S., Nebenfuhr, B., Choudhary, V., Satpute-Krishnan, P., Levine, T. P.,  
832 Golden, A. and Prinz, W. A.** (2018). Lipid droplet and peroxisome biogenesis occur at the  
833 same ER subdomains. *Nat Commun* **9**, 2940.

834 **Kim, D., Langmead, B. and Salzberg, S. L.** (2015). HISAT: a fast spliced aligner with  
835 low memory requirements. *Nat Methods* **12**, 357-60.

836 **Kim, P.** (2017). Peroxisome Biogenesis: A Union between Two Organelles. *Curr Biol*  
837 **27**, R271-R274.

838 **Kim, P. K. and Hettema, E. H.** (2015). Multiple pathways for protein transport to  
839 peroxisomes. *J Mol Biol* **427**, 1176-90.

840 **Kim, P. K., Mullen, R. T., Schumann, U. and Lippincott-Schwartz, J.** (2006). The  
841 origin and maintenance of mammalian peroxisomes involves a de novo PEX16-dependent  
842 pathway from the ER. *J Cell Biol* **173**, 521-32.

843 **Kong, J., Ji, Y., Jeon, Y. G., Han, J. S., Han, K. H., Lee, J. H., Lee, G., Jang, H., Choe, S.  
844 S., Baes, M. et al.** (2020). Spatiotemporal contact between peroxisomes and lipid droplets  
845 regulates fasting-induced lipolysis via PEX5. *Nature Communications* **11**, 578.

846 **Kory, N., Farese, R. V., Jr. and Walther, T. C.** (2016). Targeting Fat: Mechanisms of  
847 Protein Localization to Lipid Droplets. *Trends Cell Biol* **26**, 535-546.

848 **Kory, N., Thiam, A. R., Farese, R. V., Jr. and Walther, T. C.** (2015). Protein  
849 Crowding Is a Determinant of Lipid Droplet Protein Composition. *Dev Cell* **34**, 351-63.

850 **Krahmer, N., Guo, Y., Wilfling, F., Hilger, M., Lingrell, S., Heger, K., Newman, H.**  
851 **W., Schmidt-Supprian, M., Vance, D. E., Mann, M. et al.** (2011). Phosphatidylcholine  
852 synthesis for lipid droplet expansion is mediated by localized activation of  
853 CTP:phosphocholine cytidyltransferase. *Cell Metab* **14**, 504-15.

854 **Krahmer, N., Hilger, M., Kory, N., Wilfling, F., Stoehr, G., Mann, M., Farese, R. V.,**  
855 **Jr. and Walther, T. C.** (2013). Protein correlation profiles identify lipid droplet proteins  
856 with high confidence. *Mol Cell Proteomics* **12**, 1115-26.

857 **Kramer, D. A., Quiroga, A. D., Lian, J., Fahlman, R. P. and Lehner, R.** (2018).  
858 Fasting and refeeding induces changes in the mouse hepatic lipid droplet proteome. *Journal*  
859 *of proteomics* **181**, 213-224.

860 **Kuhnlein, R. P.** (2011). The contribution of the Drosophila model to lipid droplet  
861 research. *Prog Lipid Res* **50**, 348-56.

862 **Kuhnlein, R. P.** (2012). Thematic review series: Lipid droplet synthesis and  
863 metabolism: from yeast to man. Lipid droplet-based storage fat metabolism in Drosophila. *J*  
864 *Lipid Res* **53**, 1430-6.

865 **Lass, A., Zimmermann, R., Oberer, M. and Zechner, R.** (2011). Lipolysis - a highly  
866 regulated multi-enzyme complex mediates the catabolism of cellular fat stores. *Prog Lipid*  
867 *Res* **50**, 14-27.

- 868 **Lee, H., Peng, Y. and Guo, Y.** (2013). Analysis of lipid droplet dynamics and  
869 functions in *Drosophila melanogaster*. *Methods Cell Biol* **116**, 53-69.
- 870 **Lodhi, I. J. and Semenkovich, C. F.** (2014). Peroxisomes: a nexus for lipid  
871 metabolism and cellular signaling. *Cell Metab* **19**, 380-92.
- 872 **Love, M. I., Huber, W. and Anders, S.** (2014). Moderated estimation of fold change  
873 and dispersion for RNA-seq data with DESeq2. *Genome Biol* **15**, 550.
- 874 **Marcinkiewicz, A., Gauthier, D., Garcia, A. and Brasaemle, D. L.** (2006). The  
875 phosphorylation of serine 492 of perilipin a directs lipid droplet fragmentation and  
876 dispersion. *J Biol Chem* **281**, 11901-9.
- 877 **Mast, F. D., Li, J., Virk, M. K., Hughes, S. C., Simmonds, A. J. and Rachubinski, R. A.**  
878 (2011). A *Drosophila* model for the Zellweger spectrum of peroxisome biogenesis  
879 disorders. *Dis Model Mech* **4**, 659-72.
- 880 **Mast, F. D., Rachubinski, R. A. and Aitchison, J. D.** (2020). Peroxisome  
881 prognostications: Exploring the birth, life, and death of an organelle. *Journal of Cell Biology*  
882 **219**.
- 883 **McFie, P. J., Banman, S. L., Kary, S. and Stone, S. J.** (2011). Murine diacylglycerol  
884 acyltransferase-2 (DGAT2) can catalyze triacylglycerol synthesis and promote lipid droplet  
885 formation independent of its localization to the endoplasmic reticulum. *J Biol Chem* **286**,  
886 28235-46.
- 887 **Musselman, L. P. and Kuhnlein, R. P.** (2018). *Drosophila* as a model to study  
888 obesity and metabolic disease. *J Exp Biol* **221**.
- 889 **Natsuyama, R., Okumoto, K. and Fujiki, Y.** (2013). Pex5p stabilizes Pex14p: a  
890 study using a newly isolated pex5 CHO cell mutant, ZPEG101. *Biochem J* **449**, 195-207.

- 891 **Niederhoff, K., Meindl-Beinker, N. M., Kerksen, D., Perband, U., Schäfer, A.,**  
892 **Schliebs, W. and Kunau, W. H.** (2005). Yeast Pex14p possesses two functionally distinct  
893 Pex5p and one Pex7p binding sites. *J Biol Chem* **280**, 35571-8.
- 894 **Nordgren, M., Wang, B., Apanasets, O. and Fransen, M.** (2013). Peroxisome  
895 degradation in mammals: mechanisms of action, recent advances, and perspectives.  
896 *Frontiers in Physiology* **4**.
- 897 **Oliveira, M. E. M., Reguenga, C., Gouveia, A. M. M., Guimarães, C. P., Schliebs, W.,**  
898 **Kunau, W.-H., Silva, M. T., Sá-Miranda, C. and Azevedo, J. E.** (2002). Mammalian Pex14p:  
899 membrane topology and characterisation of the Pex14p–Pex14p interaction. *Biochimica et*  
900 *Biophysica Acta (BBA) - Biomembranes* **1567**, 13-22.
- 901 **Olzmann, J. A. and Carvalho, P.** (2019). Dynamics and functions of lipid droplets.  
902 *Nat Rev Mol Cell Biol* **20**, 137-155.
- 903 **Pertea, M., Kim, D., Pertea, G. M., Leek, J. T. and Salzberg, S. L.** (2016). Transcript-  
904 level expression analysis of RNA-seq experiments with HISAT, StringTie and Ballgown. *Nat*  
905 *Protoc* **11**, 1650-67.
- 906 **Pinto, M. P., Grou, C. P., Alencastre, I. S., Oliveira, M. E., Sá-Miranda, C., Fransen,**  
907 **M. and Azevedo, J. E.** (2006). The import competence of a peroxisomal membrane protein  
908 is determined by Pex19p before the docking step. *J Biol Chem* **281**, 34492-502.
- 909 **Piper, M. D., Blanc, E., Leitao-Goncalves, R., Yang, M., He, X., Linford, N. J.,**  
910 **Hoddinott, M. P., Hopfen, C., Soultoukis, G. A., Niemeyer, C. et al.** (2014). A holidic  
911 medium for *Drosophila melanogaster*. *Nat Methods* **11**, 100-5.
- 912 **Pridie, C., Ueda, K. and Simmonds, A. J.** (2020). Rosy Beginnings: Studying  
913 Peroxisomes in *Drosophila*. *Frontiers in Cell and Developmental Biology* **8**.

914           **Reis, T., Van Gilst, M. R. and Hariharan, I. K.** (2010). A buoyancy-based screen of  
915 *Drosophila* larvae for fat-storage mutants reveals a role for Sir2 in coupling fat storage to  
916 nutrient availability. *PLoS Genet* **6**, e1001206.

917           **Reuter, M., Kooshapur, H., Suda, J.-G., Gaussmann, S., Neuhaus, A., Brühl, L.,**  
918 **Bharti, P., Jung, M., Schliebs, W., Sattler, M. et al.** (2021). Competitive Microtubule  
919 Binding of PEX14 Coordinates Peroxisomal Protein Import and Motility. *Journal of*  
920 *Molecular Biology* **433**, 166765.

921           **Robinson, M. D., McCarthy, D. J. and Smyth, G. K.** (2010). edgeR: a Bioconductor  
922 package for differential expression analysis of digital gene expression data. *Bioinformatics*  
923 **26**, 139-40.

924           **Rucktaschel, R., Halbach, A., Girzalsky, W., Rottensteiner, H. and Erdmann, R.**  
925 (2010). De novo synthesis of peroxisomes upon mitochondrial targeting of Pex3p. *Eur J Cell*  
926 *Biol* **89**, 947-54.

927           **Sacksteder, K. A., Jones, J. M., South, S. T., Li, X., Liu, Y. and Gould, S. J.** (2000).  
928 PEX19 binds multiple peroxisomal membrane proteins, is predominantly cytoplasmic, and  
929 is required for peroxisome membrane synthesis. *J Cell Biol* **148**, 931-44.

930           **Schell-Steven, A., Stein, K., Amoros, M., Landgraf, C., Volkmer-Engert, R.,**  
931 **Rottensteiner, H. and Erdmann, R.** (2005). Identification of a novel, intraperoxisomal  
932 pex14-binding site in pex13: association of pex13 with the docking complex is essential for  
933 peroxisomal matrix protein import. *Mol Cell Biol* **25**, 3007-18.

934           **Schneider, I.** (1972). Cell lines derived from late embryonic stages of *Drosophila*  
935 *melanogaster*. *J Embryol Exp Morphol* **27**, 353-65.



936           **Schrader, M.** (2001). Tubulo-reticular clusters of peroxisomes in living COS-7 cells:  
937 dynamic behavior and association with lipid droplets. *J Histochem Cytochem* **49**, 1421-29.

938           **Schrader, M. and Pellegrini, L.** (2017). The making of a mammalian peroxisome,  
939 version 2.0: mitochondria get into the mix. *Cell Death & Differentiation* **24**, 1148-1152.

940           **Stone, S. J., Levin, M. C., Zhou, P., Han, J., Walther, T. C. and Farese, R. V., Jr.**  
941 (2009). The endoplasmic reticulum enzyme DGAT2 is found in mitochondria-associated  
942 membranes and has a mitochondrial targeting signal that promotes its association with  
943 mitochondria. *J Biol Chem* **284**, 5352-61.

944           **Sugiura, A., Mattie, S., Prudent, J. and McBride, H. M.** (2017). Newly born  
945 peroxisomes are a hybrid of mitochondrial and ER-derived pre-peroxisomes. *Nature* **542**,  
946 251-254.

947           **Sui, X., Arlt, H., Brock, K. P., Lai, Z. W., DiMaio, F., Marks, D. S., Liao, M., Farese,**  
948 **R. V., Jr. and Walther, T. C.** (2018). Cryo-electron microscopy structure of the lipid  
949 droplet-formation protein seipin. *J Cell Biol* **217**, 4080-4091.

950           **Tennessen, J. M., Barry, W. E., Cox, J. and Thummel, C. S.** (2014). Methods for  
951 studying metabolism in *Drosophila*. *Methods* **68**, 105-15.

952           **Thiam, A. R. and Dugail, I.** (2019). Lipid droplet-membrane contact sites - from  
953 protein binding to function. *J Cell Sci* **132**.

954           **van der Zand, A., Braakman, I. and Tabak, H. F.** (2010). Peroxisomal membrane  
955 proteins insert into the endoplasmic reticulum. *Mol Biol Cell* **21**, 2057-65.

956           **van der Zand, A., Gent, J., Braakman, I. and Tabak, H. F.** (2012). Biochemically  
957 distinct vesicles from the endoplasmic reticulum fuse to form peroxisomes. *Cell* **149**, 397-  
958 409.

- 959           **van der Zand, A. and Tabak, H. F.** (2013). Peroxisomes: offshoots of the ER. *Curr*  
960 *Opin Cell Biol* **25**, 449-54.
- 961           **Varet, H., Brillet-Guéguen, L., Coppée, J. Y. and Dillies, M. A.** (2016). SARTools: A  
962 DESeq2- and EdgeR-Based R Pipeline for Comprehensive Differential Analysis of RNA-Seq  
963 Data. *PLoS One* **11**, e0157022.
- 964           **Vinci, G., Xia, X. and Veitia, R. A.** (2008). Preservation of genes involved in sterol  
965 metabolism in cholesterol auxotrophs: facts and hypotheses. *PLoS One* **3**, e2883.
- 966           **Violante, S., Achetib, N., van Roermund, C. W. T., Hagen, J., Dodatko, T., Vaz, F.**  
967 **M., Waterham, H. R., Chen, H., Baes, M., Yu, C. et al.** (2019). Peroxisomes can oxidize  
968 medium- and long-chain fatty acids through a pathway involving ABCD3 and HSD17B4.  
969 *FASEB J* **33**, 4355-4364.
- 970           **Walther, T. C., Chung, J. and Farese, R. V., Jr.** (2017). Lipid Droplet Biogenesis.  
971 *Annu Rev Cell Dev Biol* **33**, 491-510.
- 972           **Wang, H., Becuwe, M., Housden, B. E., Chitraju, C., Porras, A. J., Graham, M. M.,**  
973 **Liu, X. N., Thiam, A. R., Savage, D. B., Agarwal, A. K. et al.** (2016). Seipin is required for  
974 converting nascent to mature lipid droplets. *Elife* **5**.
- 975           **Wessel, D. and Flügge, U. I.** (1984). A method for the quantitative recovery of  
976 protein in dilute solution in the presence of detergents and lipids. *Anal Biochem* **138**, 141-3.
- 977           **Wilfling, F., Haas, J. T., Walther, T. C. and Farese, R. V., Jr.** (2014). Lipid droplet  
978 biogenesis. *Curr Opin Cell Biol* **29**, 39-45.
- 979           **Wilfling, F., Wang, H., Haas, J. T., Krahmer, N., Gould, T. J., Uchida, A., Cheng, J.**  
980 **X., Graham, M., Christiano, R., Frohlich, F. et al.** (2013). Triacylglycerol synthesis

981 enzymes mediate lipid droplet growth by relocalizing from the ER to lipid droplets. *Dev Cell*  
982 **24**, 384-99.

983 **Will, G. K., Soukupova, M., Hong, X., Erdmann, K. S., Kiel, J. A., Dodt, G., Kunau,**  
984 **W. H. and Erdmann, R.** (1999). Identification and characterization of the human  
985 orthologue of yeast Pex14p. *Mol Cell Biol* **19**, 2265-77.

986 **Woodcock, K. J., Kierdorf, K., Pouchelon, C. A., Vivancos, V., Dionne, M. S. and**  
987 **Geissmann, F.** (2015). Macrophage-derived upd3 cytokine causes impaired glucose  
988 homeostasis and reduced lifespan in *Drosophila* fed a lipid-rich diet. *Immunity* **42**, 133-44.

989 **Xu, N., Zhang, S. O., Cole, R. A., McKinney, S. A., Guo, F., Haas, J. T., Bobba, S.,**  
990 **Farese, R. V., Jr. and Mak, H. Y.** (2012). The FATP1-DGAT2 complex facilitates lipid  
991 droplet expansion at the ER-lipid droplet interface. *J Cell Biol* **198**, 895-911.

992 **Zimmermann, R., Strauss, J. G., Haemmerle, G., Schoiswohl, G., Birner-**  
993 **Gruenberger, R., Riederer, M., Lass, A., Neuberger, G., Eisenhaber, F., Hermetter, A. et**  
994 **al.** (2004). Fat Mobilization in Adipose Tissue Is Promoted by Adipose Triglyceride Lipase.  
995 *Science* **306**, 1383.

996

997 *Figure Legends*

998 **Figure 1 *Pex* gene RNAi knockdown in the fat body affected lipid storage and survival.**

999 A) Fat body adhered to salivary glands (arrows) along with Malpighian tubule (arrowhead)  
1000 dissected from r4-GAL4xUAS-stinger GFP larvae. B) GFP expression confirmed that the r4-  
1001 GAL4 driver was active in fat body and salivary glands (arrows). Malpighian tubules  
1002 (arrowhead) did not express GFP. C) Relative larval buoyancy in 12% sucrose was used as a  
1003 screen for changes in overall fat-storage. RNAi knockdown screen (r4-GAL4) of most *Pex* genes  
1004 (*Pex1*, *Pex2*, *Pex5*, *Pex11a/b* and *Pex12*) showed weak buoyancy reduction of (<40% of larva  
1005 below the top quartile, dark green). *Pex13*, *Pex14* and *Pex16* crosses had larvae with over 40% in  
1006 the bottom quartile (dark red). Asterisk indicates heterozygous strains where only homozygous  
1007 mutant animals were tested. The strongest effects were seen with UAS-*Pex14* RNAi  
1008 (HMC06491 and GD2759). D) Follow up characterization of r4-GAL4xUAS-*Pex14* RNAi  
1009 (GD2759) animals showed significantly reduced buoyancy compared to a *w<sup>1118</sup>* (no GAL4)  
1010 control cross (\*\*\*\*,  $p < 0.0001$ ). E) r4-GAL4xUAS-*Pex14* RNAi (GD2759) showed reduced  
1011 glycerol levels compared to wild type control indicating reduced TG levels (\*\*,  $p < 0.01$ ). F) Fat  
1012 body dissected from control animals have multiple large droplets of neutral lipids as evidenced  
1013 by Nile Red staining in individual cells demarked by nuclear DAPI staining G) r4-GAL4xUAS-  
1014 *Pex14* RNAi (GD2759) animals have smaller LDs in fat body. Scale bar = 10 $\mu$ m. H) The  
1015 average volume of fat body LDs is reduced by *Pex14* RNAi (DG2759) (\*\*,  $p < 0.01$ ). I) Survival  
1016 of third instar transferred to holidic (lipid reduced) food versus holidic food supplemented with  
1017 lard. While low fat diet does not significantly affect survival, *Pex13* or *Pex14* RNAi knockdown  
1018 in the fat body showed reduced survival compared to *Pex1* RNAi or wild type control animals.

1019 **Figure 2. Culture of S2 cells in conditions promoting LD formation or lipolysis caused**  
1020 **changes in *Pex* gene expression and Pex protein localization.**

1021 A) The average number of peroxisomes observed in cells cultured in Standard, +Oleate, or  
1022 Lipolytic culture conditions. B) A volcano plot comparing differences in mRNA expression in  
1023 S2 cells in Standard versus +Oleate conditions. Red dots represent those mRNAs with  
1024 statistically significant differences between the two conditions. Complete mRNA SEQ data is  
1025 provided as Supplementary Tables 1-2. C) Quantitative RT-PCR can detect altered levels of  
1026 *Pex14* relative to *Pex2*, *Pex3* or *Pex13* mRNAs in S2 cells in +Oleate or Lipolytic conditions (\*\*,  
1027  $p < 0.01$ ). D) In S2 cells cultured under Standard conditions, markers for mature peroxisomes  
1028 (green,  $\alpha$ SKL) and endogenous Pex14 (red,  $\alpha$ Pex14) signal are overlapping (yellow), and few  
1029 LDs are present (blue, LipidTOX). E) When S2 cells were cultured in +Oleate conditions a  
1030 portion of the Pex14 signal that does not overlap with the mature peroxisome marker SKL was  
1031 observed surrounding LDs. F) When cells are transferred from +Oleate to Lipolytic conditions,  
1032 LDs were more numerous and smaller (indicating fragmentation) and the SKL-independent  
1033 Pex14 signal is seen only surrounding larger LDs. Scale bars = 2nm. G) A representative western  
1034 blot showing relative levels of Pex14 ( $\alpha$ Pex14) normalized to tubulin ( $\alpha$ Tub) in cells cultured in  
1035 Standard, +Oleate and Lipolytic conditions. H) Quantification of expression of Pex14 relative to  
1036 Tubulin in cells cultured in +Oleate and Lipolytic conditions, relative to Standard conditions  
1037 ( $n=3$ ). I) Peroxisome markers GFP-SKL (green, matrix) and  $\alpha$ Abcd3 (red, membrane) are  
1038 colocalized in +Oleate cells. Boxed region is showed magnified in M. J) In +Oleate cells  $\alpha$ Pex14  
1039 (red) are seen, one overlapping with GFP-SKL and the other co-localizing with the edge of LDs  
1040 (blue, LipidTOX). Boxed region showed is magnified in N. Two distinct populations of cells  
1041 were observed when cells are transferred from +Oleate to Lipolytic culture conditions. K) In

1042 approximately half the cells, a pattern of Pex14 localization like +Oleate conditions is seen.  
1043 Boxed region showed is magnified in O. L) In the other half of the cells, the LDs (blue,  
1044 LipidTOX) are fragmented and Pex14 is not associated with the perimeter of LDs. Boxed region  
1045 showed is magnified in P. Scale bars = 10nm. M-P) Zoomed images of examples cells used for  
1046 quantification of proportion of signal colocalizing with LDs with and without also colocalizing  
1047 with SKL. M) Mature peroxisome marker, Abcd3 (red,  $\alpha$ Abcd3) at LDs is largely overlapping  
1048 with SKL (green,  $\alpha$ SKL) in +Oleate cells. N) A large proportion of Pex14, (red,  $\alpha$ Pex14)  
1049 associated with LDs (blue, LipidTOX) is not colocalized with SKL in +Oleate cells. O) When  
1050 cells are transferred to Lipolytic conditions. approximately half the have a pattern of Pex14 LD  
1051 co-localization like +Oleate. P) In the other half of the cells LDs (blue) are fragmented and  
1052 Pex14 associated with LDs becomes strongly co-localized with the mature peroxisome marker  
1053 SKL. Q) Quantification of the proportion of Abcd3 or Pex14 signal co-localizing with LDs  
1054 independently of SKL. All images are shown as maximum intensity projections of deconvolved  
1055 Z stacks.  
1056

1057 **Figure 3. Pex14 and two other Pex proteins, Pex3 and Pex13, localized to LDs.**

1058 A) S2 cells cultured in +Oleate conditions treated with scrambled dsRNA (Control). B) S2 cells  
1059 cultured in +Oleate conditions treated *Pex14* dsRNA (*Pex14* RNAi). Punctate anti-SKL signal  
1060 marks peroxisomes (green,  $\alpha$ SKL), and LipidTOX Deep Red marks LDs (blue, LipidTOX). C)  
1061 S2 cells in Lipolytic culture conditions treated with scrambled dsRNA (Control) or D) S2 cells in  
1062 Lipolytic culture conditions treated with *Pex14* dsRNA (*Pex14* RNAi). Scale bar = 2 $\mu$ m. E) The  
1063 average volume of peroxisomes per S2 cell cultured under +Oleate or Lipolytic conditions  
1064 treated with *Pex14* dsRNA (*Pex14* RNAi) relative to control (\*\*,  $p < 0.01$ ). F) The average  
1065 number of peroxisomes per S2 cell cultured under +Oleate or Lipolytic conditions treated with  
1066 *Pex14* dsRNA (*Pex14* RNAi) relative to control (\*\*,  $p < 0.01$ ) G) The average volume of LDs  
1067 per cell when cultured under +Oleate or Lipolytic conditions treated *Pex14* dsRNA (*Pex14*  
1068 RNAi) relative to control (\*\*\*\*,  $p < 0.0001$ ). H) The average number of LDs per cell when  
1069 cultured under +Oleate or Lipolytic conditions treated *Pex14* dsRNA (*Pex14* RNAi) relative to  
1070 control \*,  $p < 0.05$ ). I) The amount of free glycerol present in the medium of S2 cells cultured in  
1071 Standard, +Oleate and Lipolytic conditions treated with a scrambled dsRNA amplicon or dsRNA  
1072 targeting *Pex14* (RNAi, \*\*,  $p < 0.01$ ). J) Levels of *Pex14* mRNA measured by qRT-PCR from S2  
1073 cells treated with scrambled (control) or *Pex14* dsRNA (RNAi) confirm knockdown efficiency.  
1074 K) S2 cells transfected with 6xMyc-Pex14 (red,  $\alpha$ Myc) and cultured in Standard culture  
1075 conditions. Punctate SKL (green  $\alpha$ SKL) marks peroxisomes L) In S2 cells expressing 6xMyc-  
1076 *Pex14* cultured in +Oleate conditions 6xMyc-Pex14 signal was seen surrounding a subset of LDs  
1077 independently of SKL. Each image is a maximum projection of a three-dimensional volume  
1078 encompassing the entire cell. Scale bar = 2 $\mu$ m. M) Quantitation of colocalization between  
1079 6xMyc-Pex14 and mature peroxisomes ( $\alpha$ SKL). N) Quantitation of colocalization between

1080 6xMyc-Pex14 and LDs. O) Quantitation of colocalization between mature peroxisomes ( $\alpha$ SKL).  
1081 and LDs (\*\*,  $p < 0.01$ . \*\*\*,  $p < 0.001$ ). P) Like what was observed with endogenous Pex14, in  
1082 S2 cells in Lipolytic conditions Myc-Pex14 surrounds only large LDs. Q) Western blotting  
1083 shows that 6xMyc-Pex14 is part of the LD fraction (also contains Lsd-2) of cells cultured  
1084 +Oleate conditions for 24h or 48h probed with anti-Myc (Pex14) and anti-Lsd-2 R)  $^{35}$ S-Met  
1085 pulse-chase labelling shows that newly synthesized 6xMyc-Pex14 is recruited to LDs. Cells were  
1086 incubated with  $^{35}$ S-Met immediately after transfection (0-24h) or 24h after transfection (24-72h).  
1087 Cells were cultured in +Oleate conditions or in control (untreated) conditions. Several  
1088 radiolabelled bands were observed indicating that newly synthesized proteins are recruited to  
1089 LDs that form in +oleate cells (24-72h). S) A western blot of the 24-72h LD fractions shows that  
1090 6xMyc-tagged Pex14 ( $\alpha$ Myc) is present at LDs at much higher levels in +Oleate cultured cells.  
1091 T-W) S2 cells expressing 6xMyc tagged (T) Pex6, (U) Pex10, (V) Pex3 or (W) Pex13 cultured  
1092 for 48h in +Oleate conditions. Punctate anti-SKL (green,  $\alpha$ SKL) marks mature peroxisomes,  
1093 anti-Myc (red,  $\alpha$ Myc) marks tagged proteins (red), LipidTOX Deep Red marks LDs (blue). Scale  
1094 bar = 2 $\mu$ m. X) Quantitation of colocalization between the Myc and LD (LipidTOX) signals  
1095 shows that Pex3 and Pex13 but not Pex6 or Pex10 are strongly recruited to LDs like Pex14 in  
1096 +Oleate cultured cells. Images are shown as maximum projections of a three-dimensional  
1097 volume encompassing the entire cell.



1098 **Figure 4. The C-terminal region of Pex14 mediates LD association.**

1099 A) Endogenous Pex14 (green,  $\alpha$ Pex14) does not co-localize with mitochondrial marker  
1100 cytochrome c (red,  $\alpha$ CytC) in +Oleate cells. B) In *Pex19*KO cells, Pex14 (red,  $\alpha$ Pex14) is  
1101 localized only to LDs and does not co-localize with neonGreen-SKL (green, mgrn-SKL). C) In  
1102 *Pex19*KO cells, mitochondria (red,  $\alpha$ CytC) do co-localize with neonGreen-SKLSKL (green,  
1103 nGrn-SKL). D) RNAi knockdown of Pex16 suppresses localization of Pex14 (red,  $\alpha$ Pex14),  
1104 peroxisome formation (no punctate SKL, green,  $\alpha$ SKL) or with LDs (blue, LipidTOX). E) Pex14  
1105 (green,  $\alpha$ Pex14) and cytochrome c (red,  $\alpha$ CytC) visualized simultaneously with neonGreen -SKL  
1106 and LDs (blue, LipidTOX) in *Pex19*KO cells cultured in Standard conditions. F) When  
1107 *Pex19*KO cells are transferred +Oleate conditions Pex14 (green,  $\alpha$ Pex14) surrounds LDs. G)  
1108 *Drosophila Pex14* encodes a single protein isoform that is 280 amino acids long and contains a  
1109 conserved Pex14 domain (red) with a single internal transmembrane (TM) domain (blue). Myc-  
1110 tagged transgenes expressing truncations containing the N-terminal Pex14/TM domain (Pex14<sup>1-</sup>  
1111 <sup>148</sup>), the C-terminal region plus TM domain (Pex14<sup>117-280</sup>) and the C-terminal domain alone  
1112 (Pex14<sup>148-280</sup>). Truncations containing the Pex14 region localized to peroxisomes (P), while all  
1113 constructs containing the TM domain localized to LDs. H) In +Oleate cultured cells, full length  
1114 6xMyc tagged Pex14 (red) co-localized peroxisomes (punctate green GFP-SKL) and to LDs  
1115 (blue, LipidTOX). I-J) Neither Pex14<sup>1-78</sup> nor Pex14<sup>1-117</sup> co-localized with peroxisomes or LDs. K)  
1116 Pex14<sup>1-148</sup> co-localized with peroxisomes, partially co-localized with LDs. L) Pex14<sup>117-280</sup>  
1117 formed a punctate pattern that was localized almost exclusively to the periphery of LDs. M)  
1118 Pex14<sup>148-280</sup> forms a punctate pattern that is distinct from both the LDs and peroxisomes. All  
1119 images are maximum projections of confocal images encompassing the entire cell volume. Scale  
1120 bar = 2 $\mu$ m.

1121 **Figure 5. Pex14 affects lipid storage through Hsl recruitment to the LD surface.**

1122 A) 3xFLAG-Bmm (green,  $\alpha$ FLAG) overexpressed in Lipolytic S2 cells surrounded small LDs  
1123 (blue, LipidTOX Deep Red). B) In Lipolytic cells co-overexpressing 6xMyc-Pex14 (red,  $\alpha$ Myc)  
1124 and 3xFLAG-Bmm (green,  $\alpha$ FLAG), Bmm localization to LDs was unaffected. C) When  
1125 3xFLAG-Hsl (green,  $\alpha$ FLAG) is overexpressed in Lipolytic S2 cells it surrounds LDs (blue,  
1126 LipidTOX Deep Red). D) In Lipolytic cells co-overexpressing 6xMyc-Pex14 (red,  $\alpha$ Myc) and  
1127 3xFLAG-Hsl (green,  $\alpha$ FLAG), Hsl was excluded from the large LDs, especially those where  
1128 Pex14 is present. E) Quantification of colocalization showed that Pex14 recruitment to LDs was  
1129 largely unaffected by increased levels of Bmm or Hsl. F) Quantitative analysis of Lipolytic cells  
1130 co-overexpressing Myc-Pex14 showed no effect on Bmm recruitment to LDs. When Myc-Pex14  
1131 is co-overexpressed, Hsl surrounding LDs was reduced by ~35% (\*\*,  $p < 0.01$ ). G) In Lipolytic  
1132 cells, co-overexpressing FLAG- Bmm and Myc-Pex14 shows no change in LD volume.  
1133 Overexpressing FLAG- Hsl and Myc-Pex14, LD increased average size by ~1.7x (\*\*,  $p < 0.01$ ).  
1134 H) In Lipolytic cells overexpressing FLAG- Bmm and Myc-Pex14 LD number was unaffected.  
1135 In cells overexpressing FLAG- Hsl and Myc-Pex14, LD number decreased ~2-fold. (\*,  $p < 0.04$ ).  
1136 I) In +Oleate cells co-overexpressing 6xMyc-Pex14 and 3xFLAG-Lsd-1, Pex14 does not localize  
1137 to LDs. J) In +Oleate cells co-overexpressing 6xMyc-Pex14 and 3xFLAG-Lsd-2, Myc-Pex14 is  
1138 recruited to all LDs. K) Overexpressed 3xFLAG-tagged Lsd-1 and Lsd-2 were both strongly  
1139 recruited (>60%) to LDs in +Oleate culture conditions. L) Overexpression of Lsd-1 suppresses (-  
1140 1.8x) recruitment of Pex14 to LDs (\*\*,  $p < 0.01$ ). M) +Oleate S2 cells co-overexpressing  
1141 3xFLAG-Lsd-1 6xMyc-Pex3 did not localize to LDs. N) +Oleate S2 cells co-overexpressing  
1142 3xFLAG-Lsd-1 6xMyc-Pex13 to did not localize LDs. Each image shows a maximum projection  
1143 of a three-dimensional volume encompassing the entire cell. Scale bar = 2 $\mu$ m.

1144 **Figure 6. Pex14 localization to LDs is conserved in mammalian cells.**

1145 A) In NRK cells cultured in Standard conditions, peroxisome marker ATP Binding Cassette  
1146 Subfamily D Member 3 (green  $\alpha$ ABCD3) co-localized with PEX14 (red,  $\alpha$ PEX14) and few LDs  
1147 are present (blue, LipidTOX). B) In +Oleate cultured cells, PEX14 was observed surrounding  
1148 LDs independently of ABCD3. C) When Huh7 cells were cultured Standard conditions PEX14  
1149 was not recruited to LDs. D) In + Oleate conditions large LDs formed and were surrounded by  
1150 PEX14. Each representative image is shown as a maximum projection of a three-dimensional  
1151 volume encompassing the entire cell. Scale bar = 2 $\mu$ m. E) Colocalization between Pex 14 with  
1152 LDs (LipidTOX) increased in +Oleate conditions (\*\* $p < 0.01$ ). F) Average colocalization  
1153 between ABCD3 (mature peroxisomes) and LDs is largely unaffected when NRK cells were  
1154 cultured in +Oleate conditions. G) Average peroxisome volume remains constant in NRK cells  
1155 cultured under Standard or +Oleate conditions H) The average number of peroxisomes increased  
1156 when NRK cells were transferred to +Oleate conditions (\*\*,  $p < 0.01$ ). I) Immunoblotting with  
1157 anti-PEX14 ( $\alpha$ PEX14) showed that levels of PEX14 in NRK +Oleate cell lysates increased at 24  
1158 h or 48 h compared to cells cultured in Standard conditions relative to the loading control  $\beta$ -  
1159 tubulin ( $\alpha\beta$ -TUB). J) Immunoblot quantification shoed that the relative level of PEX14 increased  
1160 4-fold after 24h of +Oleate culture and remained elevated (2-fold) after 48h. K) TEM images of  
1161 NRK cells probed with anti-PEX14 (black spots) showed PEX14 associated with vesicle-like  
1162 structures 40-100 nm in diameter (arrowheads) adjacent to LDs. L) A magnified view of the  
1163 boxed region is shown magnified in (K). M) Quantification of the proportion of PEX14 signal  
1164 relative to the LD surface. from 10 individual TEM images. Scale bar = 0.5 $\mu$ m.

1165 *Supplemental material*

1166 **Supplementary Figure 1-A screen for the effect of Pex knockdown on the fat body.**

1167 Representative images from a small-scale screen for the effect of *Pex* gene knockdown on lipid  
1168 storage in larvae with. The r4-GAL4 driver line and UAS-transgenes expressing double stranded  
1169 RNA targeting each *Pex* gene were used (See Figure 1 B-C). The value at the top of each image  
1170 indicates the efficiency of RNAi knockdown confirmed by qRTPCR in larvae where the UAS-  
1171 RNAi transgene was expressed ubiquitously via Tub-GAL4. Larvae with normal fat storage float  
1172 in 12% sucrose. For each image, the cuvette shown on the left is the knockdown experiment and,  
1173 on the right, (labelled C) control r4-GAL4 larvae suspended in a 12% sucrose solution, except  
1174 for (N) where a 15% sucrose solution was used. The unique ID for each RNAi transgene is  
1175 provided. The number in brackets under the *Pex* gene number on each cuvette indicates a serial  
1176 number used for experimental blinding. The position of the larvae in each cuvette was recorded  
1177 in terms of quartiles representing distance from the surface of the sucrose solution to the bottom.

1178

1179 **Supplementary Table 1-Complete RNA SEQ data**

1180

1181 **Supplementary Table 2-GO classification of RNAs differentially expressed in S2 cells**

1182 **cultured in Standard versus +Oleate conditions.**

1183

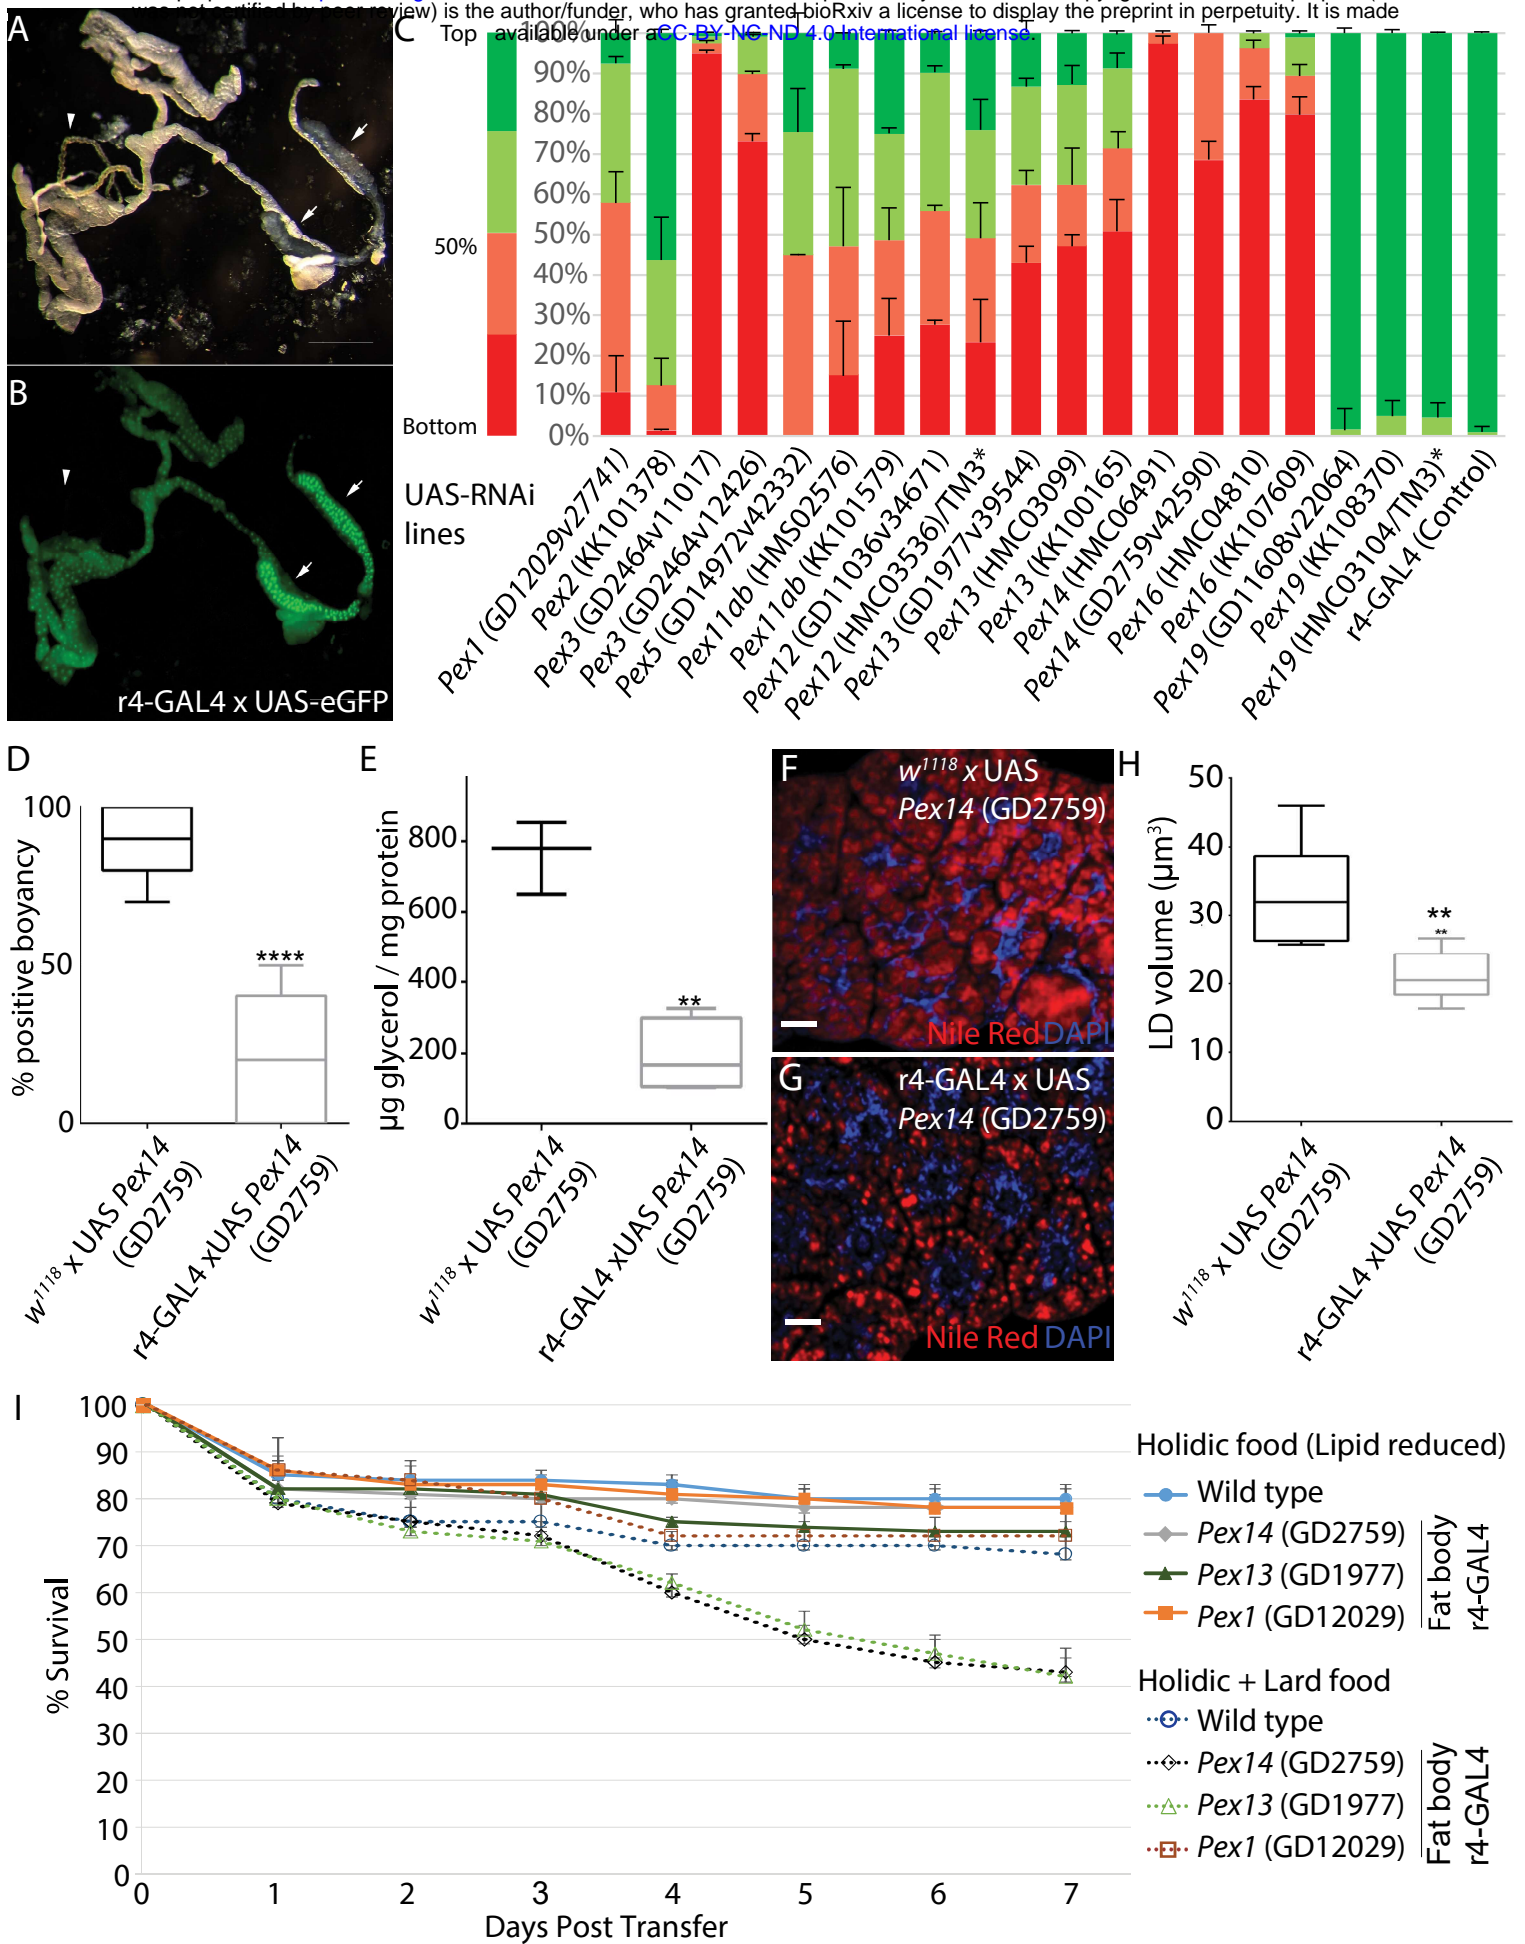

Figure 1



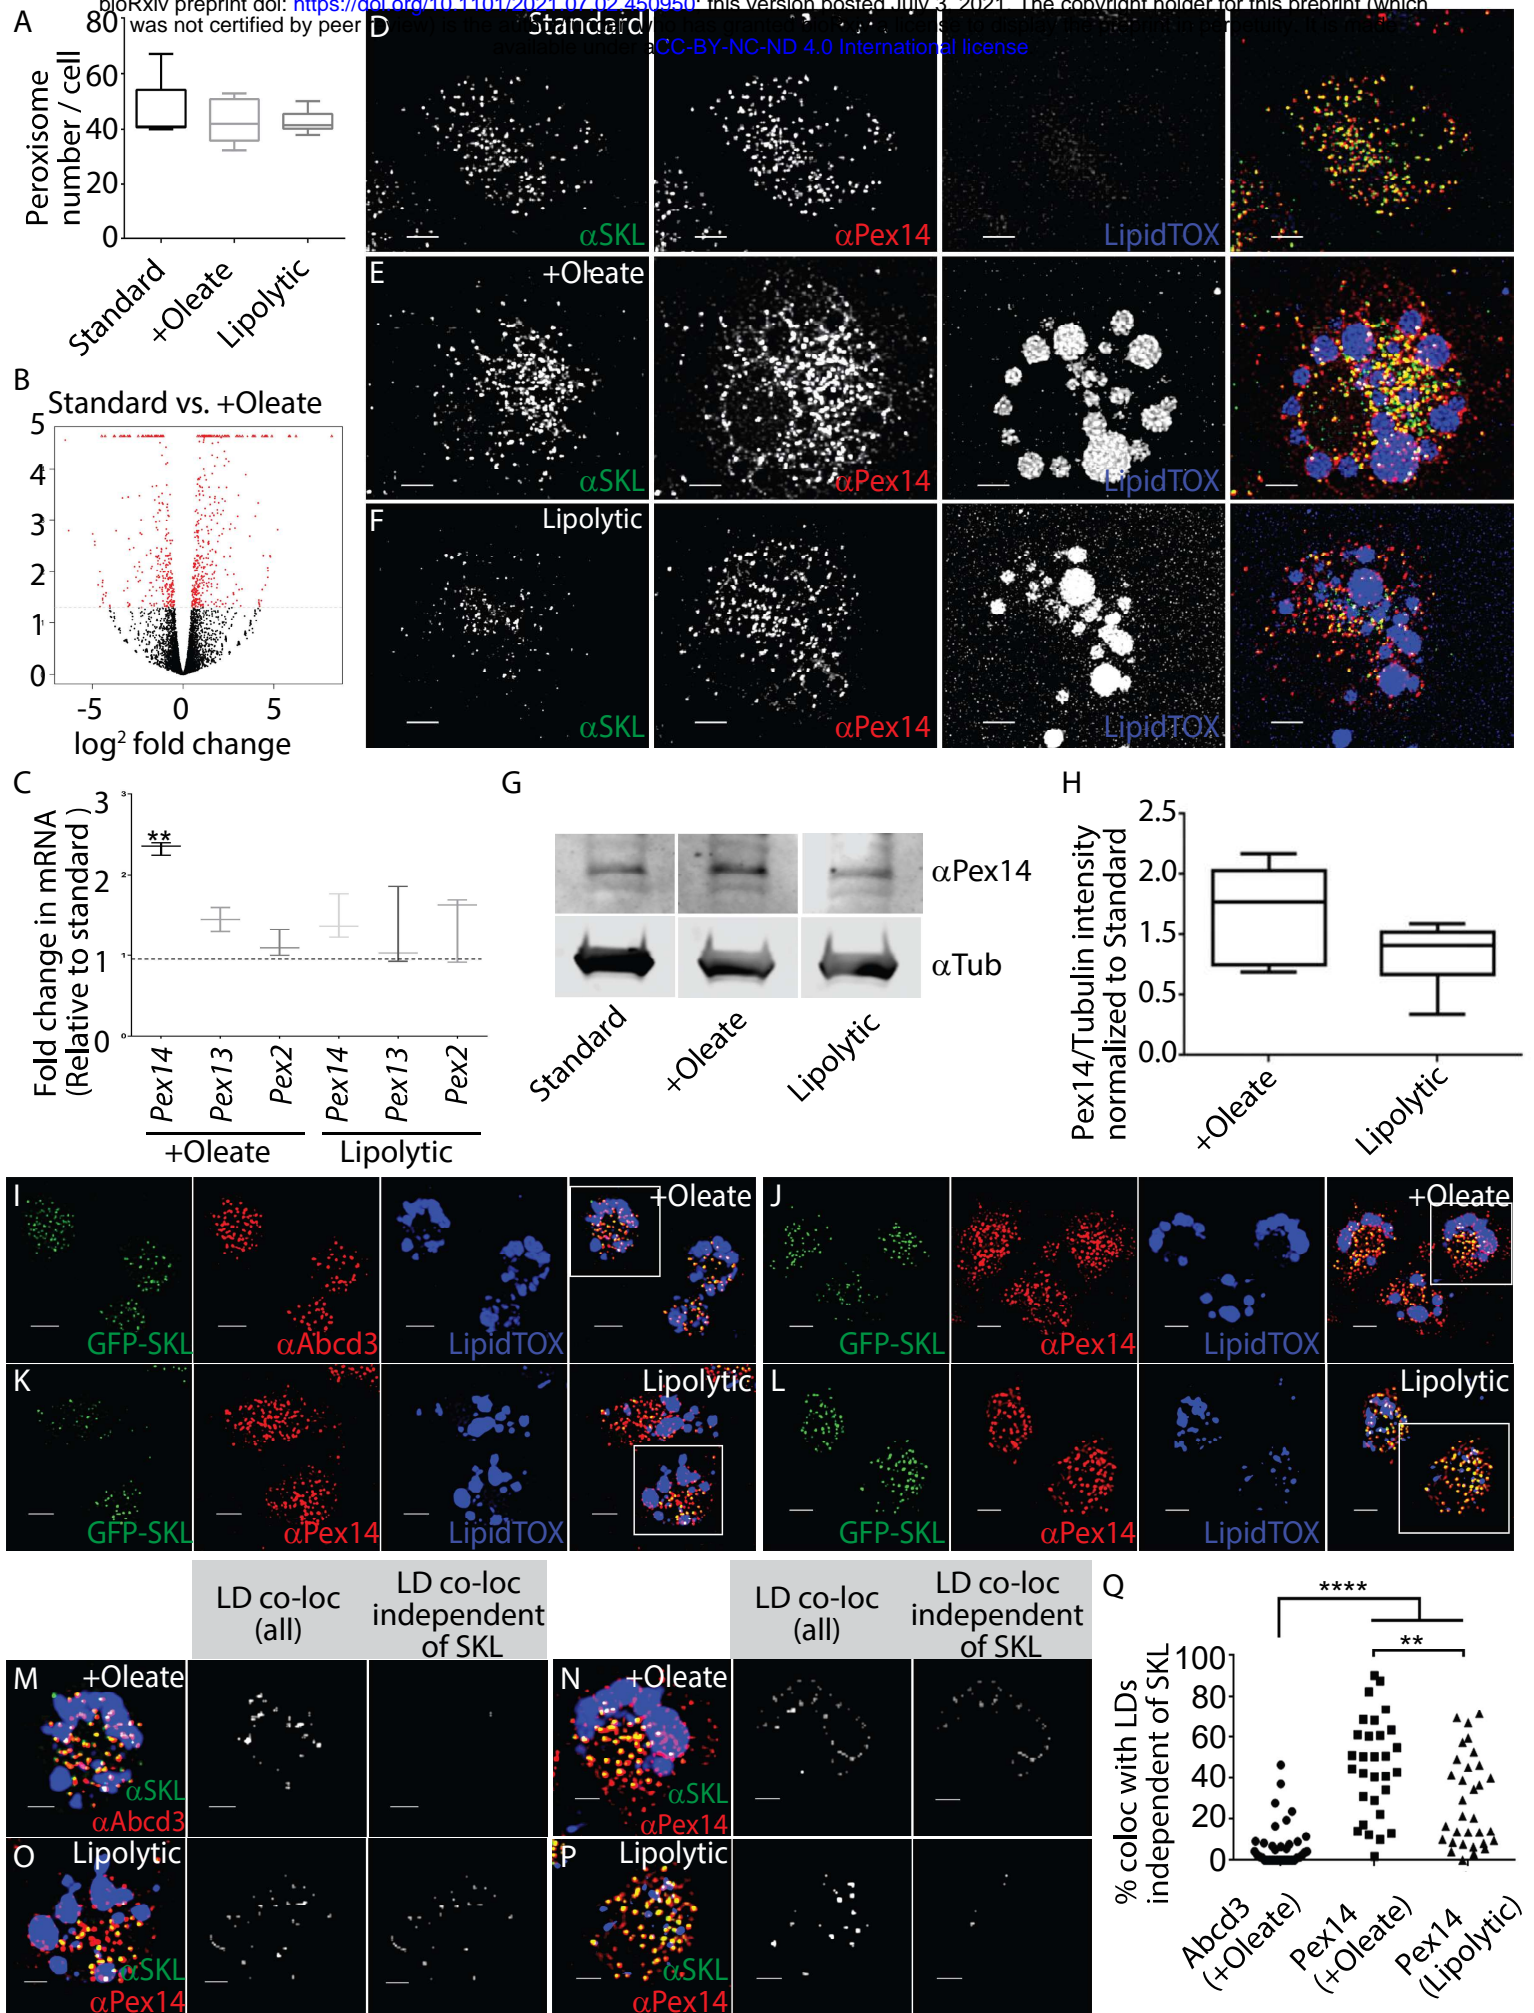

Figure 2

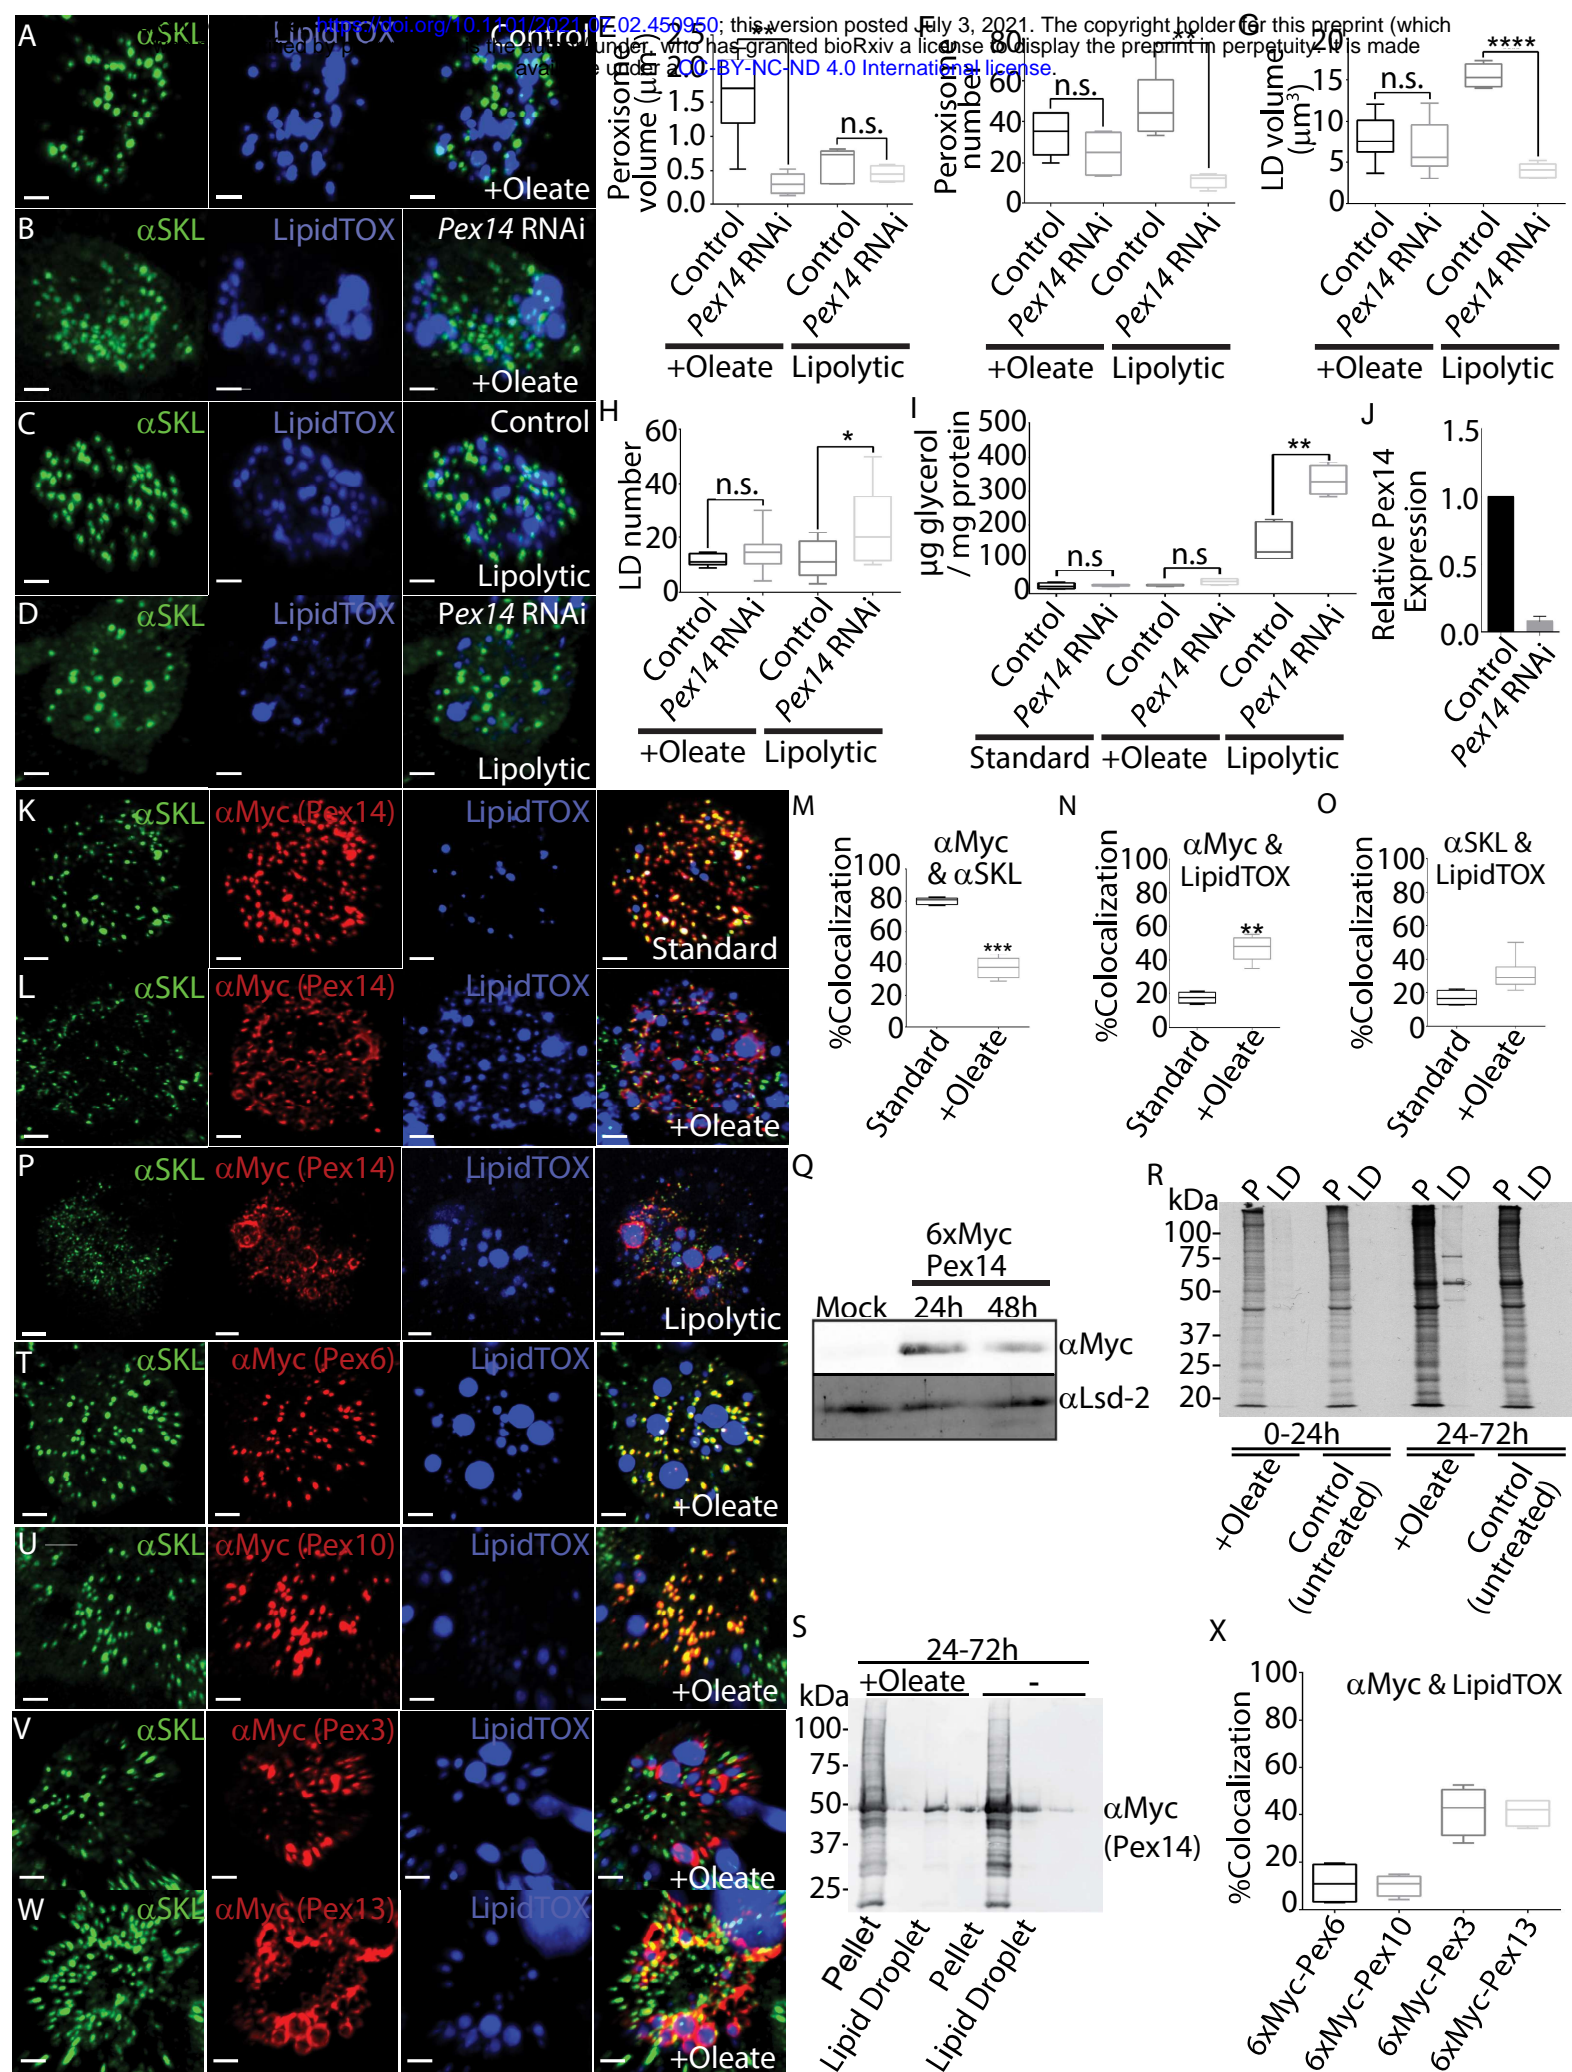

Figure 3



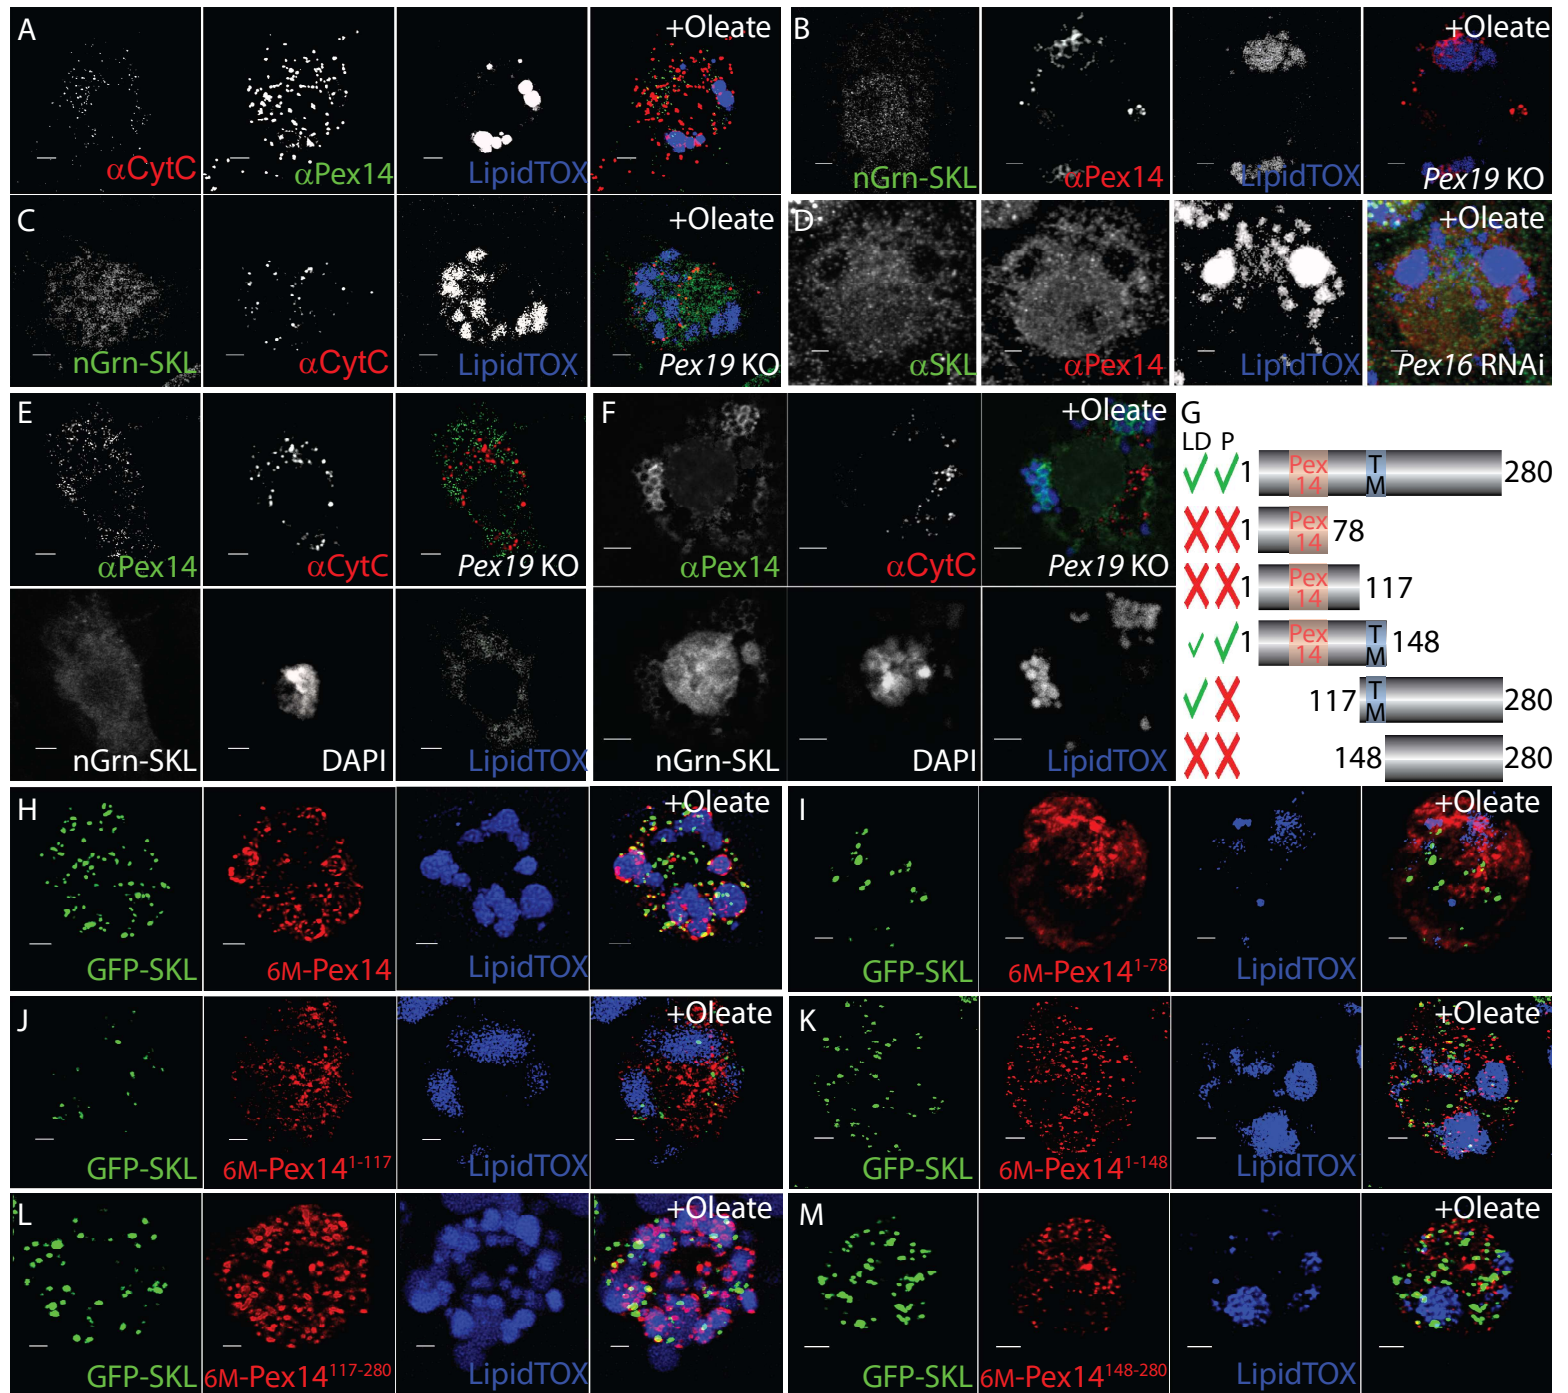

Figure 4



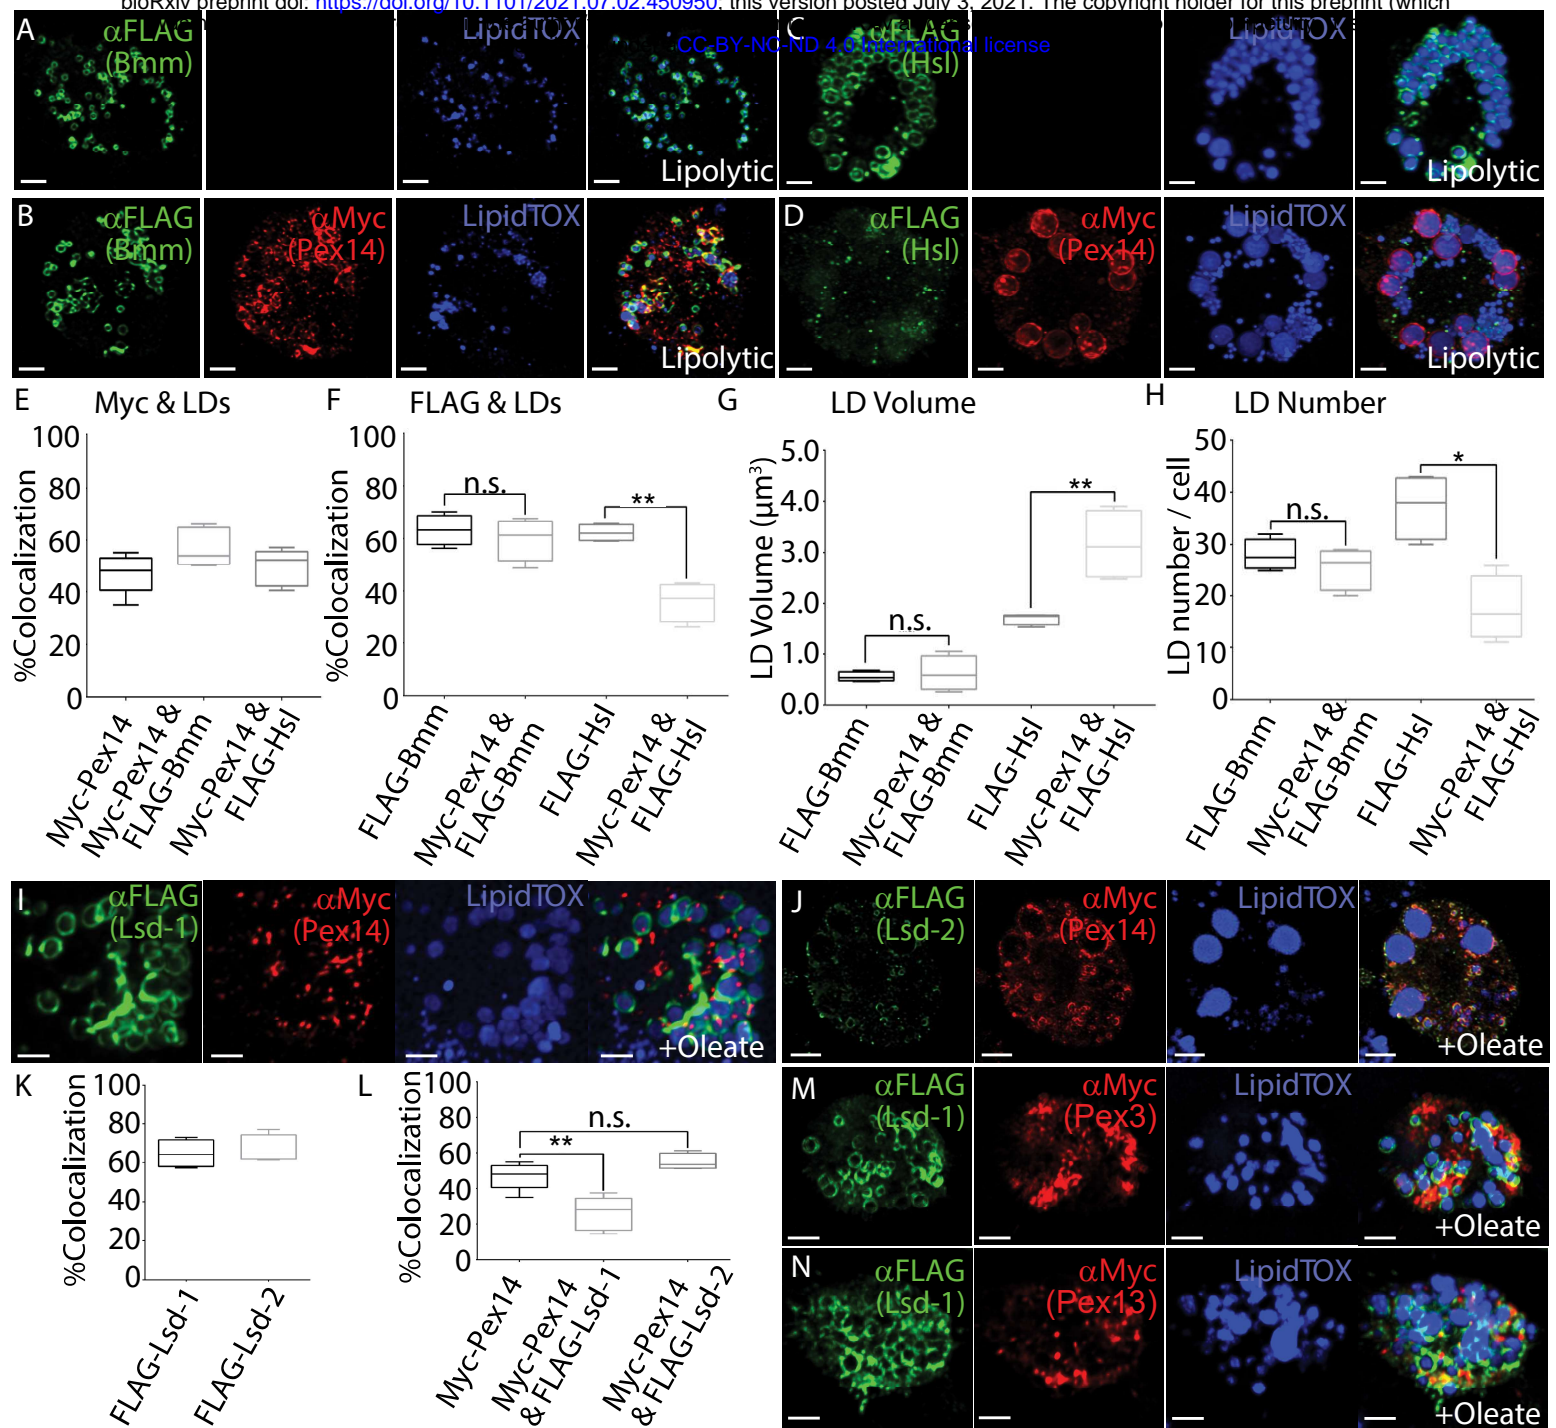

Figure 5

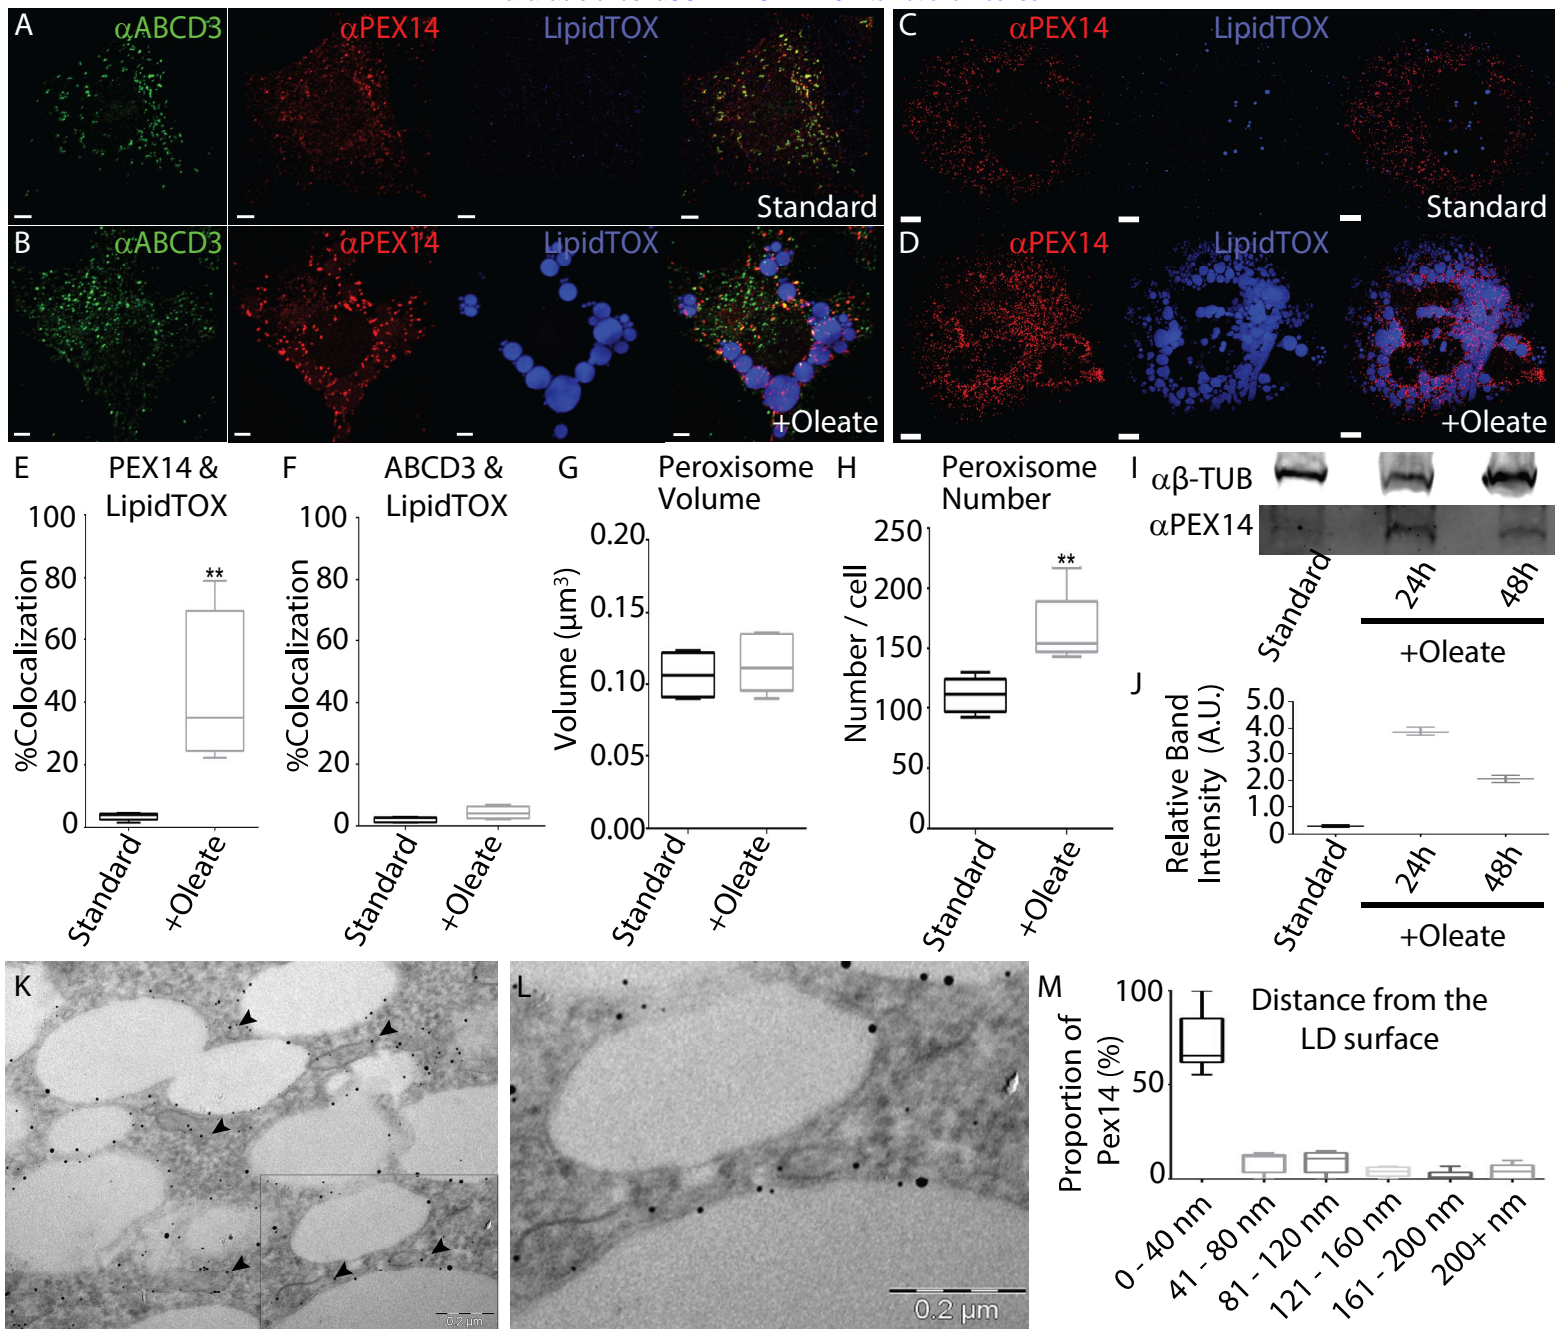

Figure 6



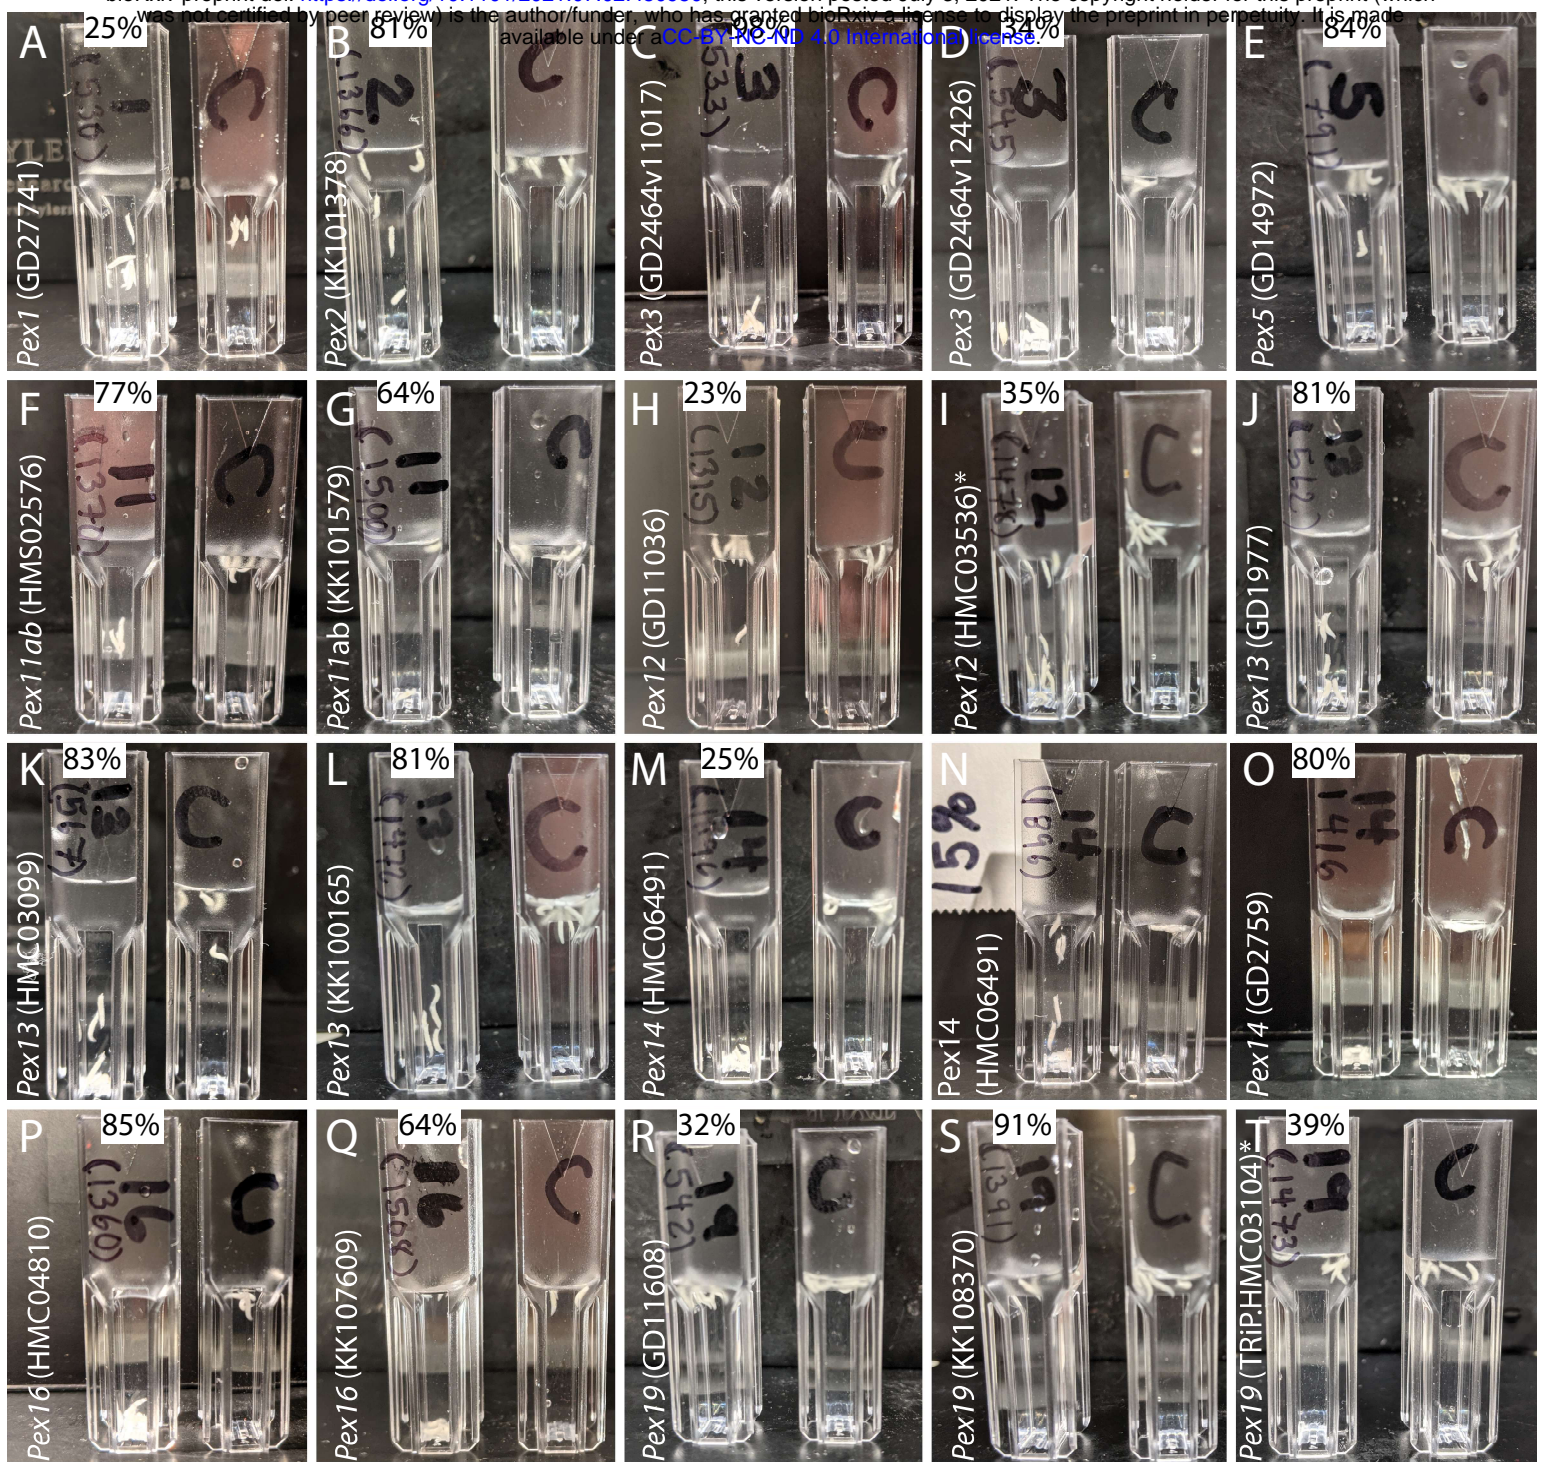

Supplementary Figure 1
